# Supplementary material for: Association of coronary dominance with the severity of coronary artery disease: a cross-sectional study in Shaanxi Province, China
Source: PubMed Central journal article supplement — BMJ Open. 2018 Nov 8;8(11):e021292. doi: 10.1136/bmjopen-2017-021292 (PMC6231567; doi:10.1136/bmjopen-2017-021292), 2018-11-08
Supplement: bmjopen-2017-021292.draft_revisions.pdf [file bmjopen-2017-021292.draft_revisions.pdf]

# BMJ Open

BMJ Open is committed to open peer review. As part of this commitment we make the peer review history of every article we publish publicly available.

When an article is published we post the peer reviewers' comments and the authors' responses online. We also post the versions of the paper that were used during peer review. These are the versions that the peer review comments apply to.

The versions of the paper that follow are the versions that were submitted during the peer review process. They are not the versions of record or the final published versions. They should not be cited or distributed as the published version of this manuscript.

BMJ Open is an open access journal and the full, final, typeset and author-corrected version of record of the manuscript is available on our site with no access controls, subscription charges or pay-per-view fees (<http://bmjopen.bmj.com>).

If you have any questions on BMJ Open's open peer review process please email [info.bmjopen@bmj.com](mailto:info.bmjopen@bmj.com)

# BMJ Open

## Impact of coronary dominance on the severity of coronary artery disease: a cross-sectional study

|                               |                                                                                                                                                                                                                                                                                                                                                                                                                                                                                                                                                                                                                                    |
|-------------------------------|------------------------------------------------------------------------------------------------------------------------------------------------------------------------------------------------------------------------------------------------------------------------------------------------------------------------------------------------------------------------------------------------------------------------------------------------------------------------------------------------------------------------------------------------------------------------------------------------------------------------------------|
| Journal:                      | <i>BMJ Open</i>                                                                                                                                                                                                                                                                                                                                                                                                                                                                                                                                                                                                                    |
| Manuscript ID                 | bmjopen-2017-021292                                                                                                                                                                                                                                                                                                                                                                                                                                                                                                                                                                                                                |
| Article Type:                 | Research                                                                                                                                                                                                                                                                                                                                                                                                                                                                                                                                                                                                                           |
| Date Submitted by the Author: | 25-Dec-2017                                                                                                                                                                                                                                                                                                                                                                                                                                                                                                                                                                                                                        |
| Complete List of Authors:     | Yan, Bin; The First Affiliated Hospital of Xi'an Jiaotong University,<br>Yang, Jian; the First Affiliated Hospital of Xi'an Jiaotong University<br>Fan, Yajuan; the First Affiliated Hospital of Xi'an Jiaotong University<br>Zhao, Binbin; the First Affiliated Hospital of Xi'an Jiaotong University,<br>Department of Psychiatry<br>Ma, Qingyan; the First Affiliated Hospital of Xi'an Jiaotong University<br>Yang, Li-Hong; The First Affiliated Hospital of Xi'an Jiaotong University,<br>Clinical Research Center<br>Ma, Xian-Cang; The First Affiliated Hospital of Xi'an Jiaotong University,<br>Clinical Research Center |
| Keywords:                     | Coronary heart disease < CARDIOLOGY, Vascular medicine < INTERNAL MEDICINE, Coronary intervention < CARDIOLOGY                                                                                                                                                                                                                                                                                                                                                                                                                                                                                                                     |
|                               |                                                                                                                                                                                                                                                                                                                                                                                                                                                                                                                                                                                                                                    |

SCHOLARONE™  
Manuscripts

1  
2  
3  
4 **Impact of coronary dominance on the severity of coronary artery**  
5  
6 **disease: a cross-sectional study**  
7

8 Bin Yan<sup>1</sup>, Jian Yang<sup>1</sup>, Yajuan Fan<sup>2</sup>, Binbin Zhao<sup>2</sup>, Qingyan Ma<sup>2</sup>, Lihong Yang<sup>1</sup>,  
9  
10 Xiancang Ma<sup>2</sup>  
11

12  
13 <sup>1</sup> Department of Clinical Research Center, the First Affiliated Hospital of Xi'an  
14  
15 Jiaotong University, Xi'an, China, <sup>2</sup> Department of Psychiatry, the First Affiliated  
16  
17 Hospital of Xi'an Jiaotong University, Xi'an, China  
18  
19

20 **Correspondence to:** Prof. Xiancang Ma, Department of Psychiatry, the First  
21  
22 Affiliated Hospital of Xi'an Jiaotong University, Xi'an, China; Phone: +86 8532 3614;  
23  
24 Email: [maxiancang@163.com](mailto:maxiancang@163.com)  
25  
26  
27  
28  
29  
30  
31  
32  
33  
34  
35  
36  
37  
38  
39  
40  
41  
42  
43  
44  
45  
46  
47  
48  
49  
50  
51  
52  
53  
54  
55  
56  
57  
58  
59  
60

## Abstract

**Objectives:** To investigate whether coronary artery dominance is associated with the severity of coronary artery disease (CAD).

**Design:** cross-sectional study

**Setting:** Single centre

**Participants:** Between July 2015 and February 2017, 1654 patients who underwent coronary angiography (CAG) were recruited in this cross-sectional study.

**Measurement and methods:** Based on the CAG results, patients were classified as left dominance (LD), right dominance (RD), and co-dominance (CD). Multiple linear regression analysis was performed to test the association between severity of CAD and coronary dominance.

**Results:** The total Gensini score was significantly higher in RD group than Left-CD group ( $42.3 \pm 33.6$  vs.  $36.3 \pm 29.8$ ;  $p=0.033$ ). After adjusting for potential confounding factors, results of multivariate linear regression showed that right dominance was associated with the severity of CAD ( $\beta$  6.699, 95% confidence interval [CI] 1.193-12.205,  $p=0.017$ ).

**Conclusions:** These results suggest that right coronary dominance was associated with the severity of CAD.

**Keywords:** coronary dominance, Gensini score, cross-sectional study, coronary angiography

### Strengths and limitations of this study

- This is the first study to demonstrate the association between right coronary artery dominance and the severity of coronary artery disease (CAD) based on a Northern Chinese population.
- The total Gensini score was significantly higher in right dominance than left-dominance and co-dominance.
- Right coronary dominance was found to be associated with the severity of CAD.
- Our study was a cross-sectional study, therefore the outcomes of patients were unavailable.

## Introduction

Coronary artery disease (CAD) is one of the most common type of disease around the world<sup>1</sup>. It is recognised that obesity, blood pressure, smoking, diabetes, exercise, diet, cholesterol, and depression was associated with the incidence of CAD<sup>2</sup>. The severity of coronary artery stenosis was usually evaluated by Gensini score or SYNTAX score in clinical practice<sup>3</sup>. Several studies have shown that coronary artery dominance is associated with cardiovascular prognosis in patients with acute coronary syndrome<sup>4-7</sup>. Variation of coronary dominance includes left dominance (LD), right dominance (RD) and co-dominance (CD) based on the vascular supply of the posterior interventricular septum (IVS)<sup>8,9</sup>. In the general population, RD is most prevalent of approximately 70% population, while LD occurs in about 20% of cases and co-dominance is present in 10% of cases<sup>10</sup>. LD was found to be associated with increased long-term mortality in patients with coronary artery disease (CAD)<sup>11,12</sup>. However, little is known about the role of RD in the CAD. Previous study showed that RD, LD and CD have a prevalence of approximately 82-89%, 5-12% and 3-7% respectively in hospital population<sup>4, 13-15</sup>. Our pilot data also found that patient with RD had a higher proportion of CAD than LD and CD. There seems to have different distribution of coronary dominance between general population and CAD patients. Therefore, we conducted this study to investigate whether patients with right coronary dominance was associated with CAD and its severity.

## Methods

### *Study population*

1654 in-hospital patients, who underwent coronary angiography (CAG) during their hospital stay, were recruited from the database of the First Affiliated Hospital of Xi'an Jiaotong University between July 2015 and February 2017. All patients included in this study because they had standard clinical indications for CAG. Exclusion criteria were (1) previous coronary artery bypass graft operation or CAG, (2) those with chronic and systemic disease, and (3) incomplete CAG reports and medical records. All patients signed the informed consent, and their records were anonymised and de-identified before analysis. The study protocol was approved by the Ethics Committee of the First Affiliated Hospital, Xi'an Jiaotong University.

Hypertension was defined as office blood pressure over 140/90 mmHg or 24-hour ambulatory blood pressure over 135/85 mmHg<sup>16</sup>. Diabetes mellitus was diagnosed as patients with a fasting plasma glucose level  $\geq 7.0$  mmol/L (126 mg/dL) or two-hour post-load plasma glucose level  $\geq 11.0$  mmol/L (200 mg/dL)<sup>17</sup>. Smoking was defined as ever smoked 100 cigarettes or currently smoking every day or some days<sup>18</sup>.

### *CAG results*

All patients underwent CAG using a standard clinical technique through femoral artery or radial artery approach<sup>19</sup>. The CAG report was written and checked by interventional cardiologists. The phenotype of coronary dominance was divided based on the CAG. The posterior descending artery was originated by the right coronary

1  
2  
3 artery in patients with RD. The posterior descending artery diverged from left  
4  
5 circumflex artery was defined as LD. Co-dominant anatomy was defined when the  
6  
7 PDA originated from the right coronary artery (RCA) and a large posterolateral  
8  
9 branch originated from the Left circumflex branch (LCx) reached near the posterior  
10  
11 interventricular groove<sup>10, 13</sup>. The severity of CAD was evaluated with the Gensini  
12  
13 score. In this scoring system, 0 indicates no abnormality, 1 represents stenosis  $\leq 25\%$ ,  
14  
15 2 represents stenosis of 26-50%, 4 represents stenosis of 51-75%, 16 represents  
16  
17 stenosis of 76-99%, and 32 represents complete occlusion. Then the score is  
18  
19 multiplied by different factors according to the functional significance of the coronary  
20  
21 artery. The importance of the segment was rated 5 for the left main trunk to 0.5 for the  
22  
23 most distal segments<sup>20, 21</sup>. The patients were then divided into four groups according  
24  
25 to the total score (0-12, 13-24, 25-52 and  $\geq 53$ )<sup>22</sup>.

### 26 27 28 29 30 31 32 33 34 35 *Statistical analysis*

36  
37 All statistical analyses were made by SPSS version 24.0 (SPSS Inc., Xi'an Jiaotong  
38  
39 University, China). *P*-value  $< 0.05$  was considered statistically significant. The  
40  
41 continuous variables are presented as mean $\pm$ standard. Categorical variables are  
42  
43 presented as number and percentages. Analysis of variance and the chi-square test  
44  
45 were used to compare variables between the subgroups of different grade of Gensini  
46  
47 score. Gensini score was divided into first grade (0-12.5), second grade (13-24.5),  
48  
49 third grade (25-52.5) and fourth grade ( $\geq 53$ ). Patients with LD or CD anatomies  
50  
51 were placed into the Left-CD group, while those with RD anatomy were included in  
52  
53  
54  
55  
56  
57  
58  
59  
60



1  
2  
3 the RD group. A multiple linear regression analysis was performed to test the  
4  
5 association between severity of CAD and variables (age, gender, smoking status,  
6  
7 diabetes mellitus, hypertension, hyperlipidaemia, heart rate, family history of CAD,  
8  
9 SBP, DBP, and coronary dominance).  
10  
11  
12  
13  
14

## 15 **Results**

### 16 *Patient characteristics*

17  
18 The study included 1654 patients (1235 males and 419 females, mean age  $59.4 \pm 10.4$ )  
19  
20 who under CAG. Patients were divided into four group based on Gensini score which  
21  
22 were 0-12 (first grade; n=347), 13-24 (second grade; n=329), 25-52 (third grade;  
23  
24 n=486) and  $\geq 53$  (fourth grade; n=492). Age, gender, SBP, DBP, heart rate, diabetes  
25  
26 mellitus, hypertension, smoking, hyperlipidaemia, coronary vessel disease, history of  
27  
28 CAD and coronary dominance were compared in the four group. Baseline  
29  
30 characteristics was shown in Table 1 according to Gensini score.  
31  
32  
33  
34  
35  
36  
37  
38  
39

### 40 *Association between Gensini score and coronary dominance*

41  
42 The total Gensini score was significantly higher in RD group than Left-CD group  
43  
44 ( $42.3 \pm 33.6$  vs.  $36.3 \pm 29.8$ ;  $p=0.033$ ). Besides, patients in the RD group have a higher  
45  
46 Gensini score than patients in the Left-CD groups in RCA ( $p<0.001$ ) and posterior  
47  
48 descending artery ( $p=0.013$ ) (Table 2). In addition, RD tended to have higher  
49  
50 proportion in third and fourth grade of Gensini score (Figure 1).  
51  
52  
53  
54  
55  
56  
57  
58  
59  
60

1  
2  
3  
4 Univariate linear regression analysis showed that right dominance, age, gender,  
5  
6 diabetes and heart rate were associated with increasing Gensini score (Table 3). After  
7  
8 adjusted for age, gender, diabetes and heart rate, right dominance ( $\beta$  6.699, 95%  
9  
10 confidence interval [CI] 1.193-12.205,  $p=0.017$ ) was positively associated with  
11  
12 Gensini score of patients. Final multiple linear regression model also showed a  
13  
14 positive correlation between right dominance and Gensini score (Table 4).  
15  
16  
17  
18  
19

## 20 21 **Discussion**

22  
23 Coronary dominance is usually classified as right dominance, left dominance and  
24  
25 co-dominance according to the blood supply of the posterior interventricular septum  
26  
27 using CAG or computed tomography coronary angiography<sup>10</sup>. Previous studies have  
28  
29 showed that coronary artery dominance was closely related to cardiovascular  
30  
31 outcomes<sup>4</sup>. A study of 1131 patient showed that LD was associated with an increased  
32  
33 risk of 30-day mortality and early reinfarction after ST-elevated myocardial  
34  
35 infarction<sup>23</sup>. Goldberg et al. demonstrated that LD was a risk factor for increased  
36  
37 long-term mortality in patients with acute coronary syndrome<sup>7</sup>. However, little is  
38  
39 known about the role of right dominance in the CAD. In this study, we found that  
40  
41 patient with right dominance was associated with the severity of CAD. The results  
42  
43 indicated that RD was more prone to have serious CAD stenosis and may serve as a  
44  
45 marker of CAD severity.  
46  
47  
48  
49  
50  
51

52  
53  
54  
55 In the general population, RD anatomy has a prevalence of approximately 70%<sup>10</sup>.  
56  
57

1  
2  
3 Besides, LD and RD have a reported prevalence of approximately 5-12% and 82-89%  
4  
5 respectively, whereas CD is found in 3-7% of individuals based on hospital  
6  
7 population<sup>5-7, 24, 25</sup>. The proportion of RD, LD and CD in our study was 90.6%, 6.7%  
8  
9 and 2.7% respectively. The phenomenon reminds us that RD group may had higher  
10  
11 percentage in hospital population than general population.  
12  
13  
14  
15

16  
17  
18 Gensini score is a quick and easy way to quantify the severity of CAD in the clinical  
19  
20 work. Therefore, we used this scoring system to further investigate the association  
21  
22 between coronary dominance and CAD. In our study, the total Gensini score of RD  
23  
24 patient was obviously higher than patient with Left-CD. After multiple lineal  
25  
26 regression, RD showed a positive correlation with Gensini score. A previous study  
27  
28 with a large population found that RD patient had a higher prevalence of triple vessel  
29  
30 disease than patient with LD<sup>25</sup>. The result indicated that patient with RD tended to  
31  
32 have more serious coronary stenosis. At present, the mechanisms between right  
33  
34 dominance and severity of CAD was still not known. Therefore, further research is  
35  
36 needed to identify factors contributing to the inferior prognosis of patients with a left  
37  
38 dominant coronary artery system.  
39  
40  
41  
42  
43  
44  
45

46  
47 Some potential limitations in this study should be noted. First, our finding was based  
48  
49 on a Northern Chinese population. Therefore, the results should not be extended to all  
50  
51 ethnic groups. Second, our data was obtained from hospital database, so the outcomes  
52  
53 of patients were unavailable. Finally, the study population was relatively small, which  
54  
55  
56  
57

1  
2  
3 led to a smaller group of individuals with left dominance and co-dominance.  
4  
5  
6  
7

## 8 **Conclusion**

9  
10 The present study reported that RD patient had a significantly higher proportion of  
11 serious coronary stenosis than patient with LD and CD. Right coronary dominance  
12 was associated with the severity of CAD. A prospective, multi-centre cohort study  
13 may further validate our findings.  
14  
15  
16  
17  
18  
19  
20  
21  
22  
23  
24  
25  
26  
27  
28  
29  
30  
31  
32  
33  
34  
35  
36  
37  
38  
39  
40  
41  
42  
43  
44  
45  
46  
47  
48  
49  
50  
51  
52  
53  
54  
55  
56  
57  
58  
59  
60

**Contributors**

All authors contributed to the study design, writing and review of the report. B.Y., J.Y., Q.M. and L.Y. collected the data. B.Z and Y.F did the primary data analysis and J.Y., B.Y. and X.M participated in further data analysis. X.M. handled supervision in our study. All authors approved the final version of the report. We also thank Qiaolong Hu, Jinni Li, Jian Kang, Chuance Yang, Li Bai, Yufeng Wang, and Wan Gao from Xi'an Jiaotong University School of Medicine for contributing to the data collection.

**Funding**

This research was supported by National Natural Science Foundation of China (Grant number: No. 81471374) and the Clinical Research Award of the First Affiliated Hospital of Xi'an Jiaotong University, China (Grant number: No. XJTU1AF-CRF-2016-005).

**Competing Interests**

The Authors declare that there is no conflict of interest.

**Data sharing statement**

No additional data are available.

## References

1. Ross R. The pathogenesis of atherosclerosis: a perspective for the 1990s. *Nature*. 1993;362(6423):801-809.
2. Drozda J, Jr., Messer JV, Spertus J, et al. ACCF/AHA/AMA-PCPI 2011 performance measures for adults with coronary artery disease and hypertension: a report of the American College of Cardiology Foundation/American Heart Association Task Force on Performance Measures and the American Medical Association-Physician Consortium for Performance Improvement. *Circulation*. 2011;124(2):248-270.
3. Sinning C, Lillpopp L, Appelbaum S, et al. Angiographic score assessment improves cardiovascular risk prediction: the clinical value of SYNTAX and Gensini application. *Clin Res Cardiol*. 2013;102(7):495-503.
4. Veltman CE, de Graaf FR, Schuijf JD, et al. Prognostic value of coronary vessel dominance in relation to significant coronary artery disease determined with non-invasive computed tomography coronary angiography. *Eur Heart J*. 2012;33(11):1367-1377.
5. Kuno T, Numasawa Y, Miyata H, et al. Impact of coronary dominance on in-hospital outcomes after percutaneous coronary intervention in patients with acute coronary syndrome. *PLoS One*. 2013;8(8):e72672.
6. Parikh NI, Honeycutt EF, Roe MT, et al. Left and codominant coronary artery circulations are associated with higher in-hospital mortality among patients undergoing percutaneous coronary intervention for acute coronary syndromes: report From the National Cardiovascular Database Cath Percutaneous Coronary Intervention (CathPCI) Registry. *Circ Cardiovasc Qual Outcomes*. 2012;5(6):775-782.
7. Goldberg A, Southern DA, Galbraith PD, et al. Coronary dominance and prognosis of patients with acute coronary syndrome. *Am Heart J*. 2007;154(6):1116-1122.
8. Altin C, Kanyilmaz S, Koc S, et al. Coronary anatomy, anatomic variations and anomalies: a retrospective coronary angiography study. *Singapore Med J*. 2015;56(6):339-345.
9. Abuchaim DC, Tanamati C, Jatene MB, et al. Coronary dominance patterns in hypoplastic left heart syndrome. *Rev Bras Cir Cardiovasc*. 2011;26(4):604-608.
10. Pelter MM, Al-Zaiti SS, Carey MG. Coronary artery dominance. *Am J Crit Care*. 2011;20(5):401-402.
11. Abu-Assi E, Castineira-Busto M, Gonzalez-Salvado V, et al. Coronary Artery Dominance and Long-term Prognosis in Patients With ST-segment Elevation Myocardial Infarction Treated With Primary Angioplasty. *Rev Esp Cardiol (Engl Ed)*. 2016;69(1):19-27.
12. Waziri H, Jorgensen E, Kelbaek H, et al. Acute myocardial infarction and lesion location in the left circumflex artery: importance of coronary artery dominance. *EuroIntervention*. 2015;11(5).
13. Veltman CE, van der Hoeven BL, Hoogslag GE, et al. Influence of coronary vessel dominance on short- and long-term outcome in patients after ST-segment elevation myocardial infarction. *Eur Heart J*. 2015;36(17):1023-1030.
14. Omerbasic E, Hasanovic A, Omerbasic A, et al. Prognostic value of anatomical dominance of coronary circulation in patients with surgical myocardial revascularization. *Med Arch*. 2015;69(1):6-9.
15. Lam MK, Tandjung K, Sen H, et al. Coronary artery dominance and the risk of adverse clinical events following percutaneous coronary intervention: insights from the prospective, randomised TWENTE trial. *EuroIntervention*. 2015;11(2):180-187.

16. Mancia G, Fagard R, Narkiewicz K, et al. 2013 ESH/ESC Guidelines for the management of arterial hypertension: the Task Force for the management of arterial hypertension of the European Society of Hypertension (ESH) and of the European Society of Cardiology (ESC). *J Hypertens*. 2013;31(7):1281-1357.
17. Vijan S. Type 2 diabetes. *Ann Intern Med*. 2010;152(5):ITC31-15; quiz ITC316.
18. Hou X, Qiu J, Chen P, et al. Cigarette Smoking Is Associated with a Lower Prevalence of Newly Diagnosed Diabetes Screened by OGTT than Non-Smoking in Chinese Men with Normal Weight. *PLoS One*. 2016;11(3):e0149234.
19. Levine GN, Bates ER, Blankenship JC, et al. 2011 ACCF/AHA/SCAI Guideline for Percutaneous Coronary Intervention: a report of the American College of Cardiology Foundation/American Heart Association Task Force on Practice Guidelines and the Society for Cardiovascular Angiography and Interventions. *Circulation*. 2011;124(23):e574-651.
20. Wang GN, Sun K, Hu DL, et al. Serum cystatin C levels are associated with coronary artery disease and its severity. *Clin Biochem*. 2014;47(16-17):176-181.
21. Yongsakulchai P, Settasatian C, Settasatian N, et al. Association of combined genetic variations in PPARgamma, PGC-1alpha, and LXRAalpha with coronary artery disease and severity in Thai population. *Atherosclerosis*. 2016;248:140-148.
22. Ndrepepa G, Tada T, Fusaro M, et al. Association of coronary atherosclerotic burden with clinical presentation and prognosis in patients with stable and unstable coronary artery disease. *Clin Res Cardiol*. 2012;101(12):1003-1011.
23. Stribling WK, Kontos MC, Abbate A, et al. Clinical outcomes in patients with acute left circumflex/obtuse marginal occlusion presenting with myocardial infarction. *J Interv Cardiol*. 2011;24(1):27-33.
24. Eren S, Bayram E, Fil F, et al. An investigation of the association between coronary artery dominance and coronary artery variations with coronary arterial disease by multidetector computed tomographic coronary angiography. *J Comput Assist Tomogr*. 2008;32(6):929-933.
25. Vasheghani-Farahani A, Kassaian SE, Yaminisharif A, et al. The association between coronary arterial dominance and extent of coronary artery disease in angiography and paraclinical studies. *Clin Anat*. 2008;21(6):519-523.

## Figure Legends

**Figure 1** Distribution of RD and Left-CD group in different grade of Gensini score.

For peer review only



Table 1 Baseline characteristics of patients

| <b>Clinical variables</b>            | Total<br>(n=1654) | First<br>(n=347) | Second<br>(n=329) | Third<br>(n=486) | Fourth<br>(n=492) |
|--------------------------------------|-------------------|------------------|-------------------|------------------|-------------------|
| Age (years)                          | 59.4±10.4         | 58.5±9.9         | 59.1±10.6         | 59.3±10.6        | 60.2±10.4         |
| Gender                               |                   |                  |                   |                  |                   |
| Male                                 | 1235 (74.7)       | 225 (64.8)       | 239 (72.6)        | 368 (75.7)       | 403 (81.9)        |
| Female                               | 419 (25.3)        | 122 (35.2)       | 90 (27.4)         | 118 (24.3)       | 89 (18.1)         |
|                                      |                   | 135.8±19.        |                   |                  |                   |
| Baseline SBP (mmHg)                  | 134.6±21.0        | 9                | 135.8±20.4        | 134.4±20.6       | 133.1±22.6        |
| Baseline DBP (mmHg)                  | 78.3±12.3         | 79.1±12.9        | 78.5±12.0         | 77.7±11.3        | 78.3±12.8         |
| Heart rate (bpm)                     | 75.5±13.2         | 74.3±12.1        | 75.3±14.0         | 75.4±12.6        | 76.6±14.1         |
| CAD risk factors                     |                   |                  |                   |                  |                   |
| Diabetes Mellitus                    | 321 (19.4)        | 33 (9.5)         | 65 (19.8)         | 102 (21.0)       | 121 (24.6)        |
| Hypertension                         | 870 (52.6)        | 174 (50.1)       | 175 (53.2)        | 263 (54.1)       | 258 (52.4)        |
| Current smoking                      | 841 (50.8)        | 156 (45.0)       | 170 (51.7)        | 262 (53.9)       | 253 (51.4)        |
| Hyperlipidemia                       | 182 (11.0)        | 42 (12.1)        | 37 (11.2)         | 51 (10.5)        | 52 (10.6)         |
| Dignosis                             |                   |                  |                   |                  |                   |
| AMI                                  | 730 (44.1)        | 44 (12.7)        | 97 (29.5)         | 251 (51.6)       | 338 (68.7)        |
| Unstable angina                      | 311 (18.8)        | 67 (19.3)        | 83 (25.2)         | 81 (16.7)        | 80 (16.3)         |
| CAD on CAG                           |                   |                  |                   |                  |                   |
| One vessel disease ( $\geq$<br>50%)  | 465 (28.1)        | 239 (68.9)       | 124 (37.7)        | 76 (15.6)        | 26 (5.3)          |
| Multivessel disease<br>( $\geq$ 50%) | 1189 (71.9)       | 108 (31.1)       | 205 (62.3)        | 410 (84.4)       | 466 (94.7)        |
| History                              |                   |                  |                   |                  |                   |
| Prior MI                             | 134 (8.1)         | 9 (2.6)          | 16 (4.9)          | 49 (10.1)        | 60 (12.2)         |
| Family history of<br>CAD             | 475 (28.7)        | 107 (30.8)       | 98 (29.8)         | 126 (25.9)       | 144 (29.3)        |
| Coronary dominance                   |                   |                  |                   |                  |                   |
| Right-                               | 1500 (90.6)       | 304 (87.6)       | 297 (90.3)        | 445 (91.5)       | 454 (92.3)        |

|       |           |          |          |          |          |
|-------|-----------|----------|----------|----------|----------|
| Left- | 110 (6.7) | 30 (8.7) | 22 (6.7) | 30 (6.2) | 28 (5.7) |
| Co-   | 44 (2.7)  | 13 (3.7) | 10 (3.0) | 11 (2.3) | 10 (2.0) |

Results are presented as mean  $\pm$  standard deviation or n (%). P for difference between the 4 groups. AMI, acute myocardial infarction; CAD, coronary artery disease; CAG, coronary artery angiography; DBP, diastolic blood pressure; MI, myocardial infarction; SBP, systolic blood pressure.

For peer review only

Table 2 Gensini score and coronary dominance

| Gensini score               | RD (n=1500) | Left+CD (n=154) | P      |
|-----------------------------|-------------|-----------------|--------|
| Total score                 | 42.3±33.6   | 36.3±29.8       | 0.033  |
| LM                          | 1.7±7.3     | 1.7±7.7         | 0.935  |
| LAD                         | 21.1±21.1   | 19.7±20.0       | 0.433  |
| RCA                         | 7.8±10.8    | 4.7±8.5         | <0.001 |
| LCX                         | 9.1±14.5    | 8.2±12.4        | 0.424  |
| Diagonal branch             | 1.3±2.7     | 1.1±2.4         | 0.402  |
| Septal branch               | 0.1±0.5     | 0.1±0.8         | 0.491  |
| OM                          | 0.7±2.2     | 0.6±2.0         | 0.848  |
| Posterior descending artery | 0.6±2.1     | 0.2±1.5         | 0.013  |

LAD, left anterior descending branch; LCx, left circumflex branch; LM, left main coronary artery; OM, obtuse marginal branch; RCA, right coronary artery.

Table 3 Univariate linear regression analysis for Gensini score

| Variable              | $\beta$ (95% CI)         | P      |
|-----------------------|--------------------------|--------|
| Right Dominance       | 5.991 (0.474 to 11.508)  | 0.033  |
| Age                   | 0.187 (0.033 to 0.342)   | 0.017  |
| Male                  | 9.811 (6.150 to 13.472)  | <0.001 |
| Smoking               | 1.098 (-2.113 to 4.309)  | 0.503  |
| Hypertension          | 1.033 (-2.182 to 4.247)  | 0.529  |
| Diabetes Mellitus     | 8.408 (4.369 to 12.447)  | <0.001 |
| Hyperlipidemia        | -2.038 (-7.167 to 3.091) | 0.436  |
| Family history of CAD | -0.652 (-4.200 to 2.896) | 0.719  |
| SBP                   | -0.065 (-0.142 to 0.013) | 0.100  |
| DBP                   | -0.008 (-0.141 to 0.125) | 0.911  |
| Heart rate            | 0.148 (0.025 to 0.271)   | 0.018  |

CAD, coronary artery disease; DBP, diastolic blood pressure; SBP, systolic blood pressure.

Table 4 Multivariate linear regression analysis for Gensini score

| Variable                                                                                                               | $\beta$ (95% CI)        | P value |
|------------------------------------------------------------------------------------------------------------------------|-------------------------|---------|
| Unadjusted                                                                                                             | 5.991 (0.474 to 11.508) | 0.033   |
| Model 1                                                                                                                | 6.404 (0.945 to 11.862) | 0.022   |
| Model 2                                                                                                                | 6.699 (1.193 to 12.205) | 0.017   |
| Model 3                                                                                                                | 6.829 (1.312 to 12.346) | 0.015   |
| Model 1 adjusted age and gender                                                                                        |                         |         |
| Model 2 adjusted age and gender, diabetes, heart rate                                                                  |                         |         |
| Model 3 adjusted age and gender, diabetes, heart rate, smoking, hypertension, hyperlipidemia, history of CAD, SBP, DBP |                         |         |

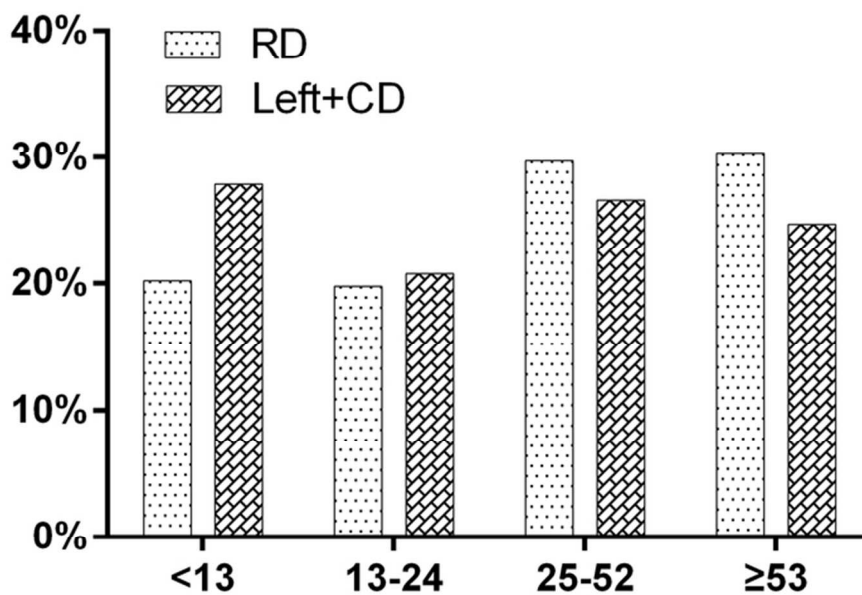

Figure 1 Distribution of RD and Left-CD group in different grade of Gensini score.

67x45mm (300 x 300 DPI)

**STROBE 2007 (v4) Statement—Checklist of items that should be included in reports of cross-sectional studies**

| Section/Topic                | Item # | Recommendation                                                                                                                                                                       | Reported on page # |
|------------------------------|--------|--------------------------------------------------------------------------------------------------------------------------------------------------------------------------------------|--------------------|
| <b>Title and abstract</b>    | 1      | (a) Indicate the study’s design with a commonly used term in the title or the abstract                                                                                               | 1                  |
|                              |        | (b) Provide in the abstract an informative and balanced summary of what was done and what was found                                                                                  | 2                  |
| <b>Introduction</b>          |        |                                                                                                                                                                                      |                    |
| Background/rationale         | 2      | Explain the scientific background and rationale for the investigation being reported                                                                                                 | 4                  |
| Objectives                   | 3      | State specific objectives, including any prespecified hypotheses                                                                                                                     | 4                  |
| <b>Methods</b>               |        |                                                                                                                                                                                      |                    |
| Study design                 | 4      | Present key elements of study design early in the paper                                                                                                                              | 5                  |
| Setting                      | 5      | Describe the setting, locations, and relevant dates, including periods of recruitment, exposure, follow-up, and data collection                                                      | 5                  |
| Participants                 | 6      | (a) Give the eligibility criteria, and the sources and methods of selection of participants                                                                                          | 5                  |
| Variables                    | 7      | Clearly define all outcomes, exposures, predictors, potential confounders, and effect modifiers. Give diagnostic criteria, if applicable                                             | 5-6                |
| Data sources/<br>measurement | 8*     | For each variable of interest, give sources of data and details of methods of assessment (measurement). Describe comparability of assessment methods if there is more than one group | 5-6                |
| Bias                         | 9      | Describe any efforts to address potential sources of bias                                                                                                                            | 6-7                |
| Study size                   | 10     | Explain how the study size was arrived at                                                                                                                                            | 5                  |
| Quantitative variables       | 11     | Explain how quantitative variables were handled in the analyses. If applicable, describe which groupings were chosen and why                                                         | 6-7                |
| Statistical methods          | 12     | (a) Describe all statistical methods, including those used to control for confounding                                                                                                | 6-7                |
|                              |        | (b) Describe any methods used to examine subgroups and interactions                                                                                                                  | N/A                |
|                              |        | (c) Explain how missing data were addressed                                                                                                                                          | N/A                |
|                              |        | (d) If applicable, describe analytical methods taking account of sampling strategy                                                                                                   | N/A                |
|                              |        | (e) Describe any sensitivity analyses                                                                                                                                                | N/A                |
| <b>Results</b>               |        |                                                                                                                                                                                      |                    |

|                          |     |                                                                                                                                                                                                              |     |
|--------------------------|-----|--------------------------------------------------------------------------------------------------------------------------------------------------------------------------------------------------------------|-----|
| Participants             | 13* | (a) Report numbers of individuals at each stage of study—eg numbers potentially eligible, examined for eligibility, confirmed eligible, included in the study, completing follow-up, and analysed            | 7   |
|                          |     | (b) Give reasons for non-participation at each stage                                                                                                                                                         | N/A |
|                          |     | (c) Consider use of a flow diagram                                                                                                                                                                           | N/A |
| Descriptive data         | 14* | (a) Give characteristics of study participants (eg demographic, clinical, social) and information on exposures and potential confounders                                                                     | 7   |
|                          |     | (b) Indicate number of participants with missing data for each variable of interest                                                                                                                          | N/A |
| Outcome data             | 15* | Report numbers of outcome events or summary measures                                                                                                                                                         | 7   |
| Main results             | 16  | (a) Give unadjusted estimates and, if applicable, confounder-adjusted estimates and their precision (eg, 95% confidence interval). Make clear which confounders were adjusted for and why they were included | 7-8 |
|                          |     | (b) Report category boundaries when continuous variables were categorized                                                                                                                                    | 7-8 |
|                          |     | (c) If relevant, consider translating estimates of relative risk into absolute risk for a meaningful time period                                                                                             | N/A |
| Other analyses           | 17  | Report other analyses done—eg analyses of subgroups and interactions, and sensitivity analyses                                                                                                               | N/A |
| <b>Discussion</b>        |     |                                                                                                                                                                                                              |     |
| Key results              | 18  | Summarise key results with reference to study objectives                                                                                                                                                     | 8   |
| Limitations              | 19  | Discuss limitations of the study, taking into account sources of potential bias or imprecision. Discuss both direction and magnitude of any potential bias                                                   | 9   |
| Interpretation           | 20  | Give a cautious overall interpretation of results considering objectives, limitations, multiplicity of analyses, results from similar studies, and other relevant evidence                                   | 8-9 |
| Generalisability         | 21  | Discuss the generalisability (external validity) of the study results                                                                                                                                        | 10  |
| <b>Other information</b> |     |                                                                                                                                                                                                              |     |
| Funding                  | 22  | Give the source of funding and the role of the funders for the present study and, if applicable, for the original study on which the present article is based                                                | 11  |

\*Give information separately for cases and controls in case-control studies and, if applicable, for exposed and unexposed groups in cohort and cross-sectional studies.

**Note:** An Explanation and Elaboration article discusses each checklist item and gives methodological background and published examples of transparent reporting. The STROBE checklist is best used in conjunction with this article (freely available on the Web sites of PLoS Medicine at <http://www.plosmedicine.org/>, Annals of Internal Medicine at <http://www.annals.org/>, and Epidemiology at <http://www.epidem.com/>). Information on the STROBE Initiative is available at [www.strobe-statement.org](http://www.strobe-statement.org).



# BMJ Open

## Impact of coronary dominance on the severity of coronary artery disease: a cross-sectional study

|                                 |                                                                                                                                                                                                                                                                                                                                                                                                                                                                                                                                                                                                                        |
|---------------------------------|------------------------------------------------------------------------------------------------------------------------------------------------------------------------------------------------------------------------------------------------------------------------------------------------------------------------------------------------------------------------------------------------------------------------------------------------------------------------------------------------------------------------------------------------------------------------------------------------------------------------|
| Journal:                        | <i>BMJ Open</i>                                                                                                                                                                                                                                                                                                                                                                                                                                                                                                                                                                                                        |
| Manuscript ID                   | bmjopen-2017-021292.R1                                                                                                                                                                                                                                                                                                                                                                                                                                                                                                                                                                                                 |
| Article Type:                   | Research                                                                                                                                                                                                                                                                                                                                                                                                                                                                                                                                                                                                               |
| Date Submitted by the Author:   | 23-Apr-2018                                                                                                                                                                                                                                                                                                                                                                                                                                                                                                                                                                                                            |
| Complete List of Authors:       | Yan, Bin; The First Affiliated Hospital of Xi'an Jiaotong University, Yang, Jian; the First Affiliated Hospital of Xi'an Jiaotong University<br>Fan, Yajuan; the First Affiliated Hospital of Xi'an Jiaotong University<br>Zhao, Binbin; the First Affiliated Hospital of Xi'an Jiaotong University, Department of Psychiatry<br>Ma, Qingyan; the First Affiliated Hospital of Xi'an Jiaotong University<br>Yang, Li-Hong; The First Affiliated Hospital of Xi'an Jiaotong University, Clinical Research Center<br>Ma, Xian-Cang; The First Affiliated Hospital of Xi'an Jiaotong University, Clinical Research Center |
| <b>Primary Subject Heading</b>: | Cardiovascular medicine                                                                                                                                                                                                                                                                                                                                                                                                                                                                                                                                                                                                |
| Secondary Subject Heading:      | Cardiovascular medicine                                                                                                                                                                                                                                                                                                                                                                                                                                                                                                                                                                                                |
| Keywords:                       | Coronary heart disease < CARDIOLOGY, Vascular medicine < INTERNAL MEDICINE, Coronary intervention < CARDIOLOGY                                                                                                                                                                                                                                                                                                                                                                                                                                                                                                         |
|                                 |                                                                                                                                                                                                                                                                                                                                                                                                                                                                                                                                                                                                                        |

SCHOLARONE™  
Manuscripts

1  
2  
3  
4 **Impact of coronary dominance on the severity of coronary artery**  
5  
6 **disease: a cross-sectional study**  
7

8 Bin Yan, MD, Jian Yang, MD, Yajuan Fan, MD, Binbin Zhao, MD, Qingyan Ma, MD,  
9

10 Lihong Yang, MD, Xiancang Ma MD, PHD  
11

12  
13 From the Department of Clinical Research Center (BY, JY, LY), and the Department  
14  
15 of Psychiatry (BZ, YF, QM, XM), the First Affiliated Hospital of Xi'an Jiaotong  
16  
17 University, Xi'an, China  
18  
19

20 **Correspondence to:** Prof. Xiancang Ma, Department of Psychiatry, the First  
21

22  
23 Affiliated Hospital of Xi'an Jiaotong University, Xi'an, China; Phone: +86 8532 3614;  
24

25 Email: [maxiancang@163.com](mailto:maxiancang@163.com)  
26  
27  
28  
29  
30  
31  
32  
33  
34  
35  
36  
37  
38  
39  
40  
41  
42  
43  
44  
45  
46  
47  
48  
49  
50  
51  
52  
53  
54  
55  
56  
57  
58  
59  
60

## Abstract

**Objectives:** To investigate whether coronary artery dominance is associated with the severity of coronary artery disease (CAD).

**Design:** cross-sectional study

**Setting:** Single centre

**Participants:** Between July 2015 and February 2017, 1654 patients who underwent coronary angiography (CAG) were recruited in this cross-sectional study.

**Measurement and methods:** Based on the CAG results, patients were classified as left dominance (LD), right dominance (RD), and co-dominance (CD). Multiple linear regression analysis was performed to test the association between severity of coronary artery disease (CAD) and coronary dominance.

**Results:** The total Gensini score was significantly higher in RD group than Left-CD group ( $42.3 \pm 33.6$  vs.  $36.3 \pm 29.8$ ;  $p=0.033$ ). After adjusting for potential confounding factors, results of multivariate linear regression showed that right dominance was associated with the severity of CAD ( $\beta$  6.699, 95% confidence interval [CI] 1.193-12.205,  $p=0.017$ ).

**Conclusions:** These results suggest that right coronary dominance was associated with the severity of CAD.

**Keywords:** coronary dominance, Gensini score, cross-sectional study, coronary angiography

**Strengths and limitations of this study**

- This is the first study to demonstrate the association between right coronary artery dominance and the severity of coronary artery disease.
- The total Gensini score was significantly higher in right dominance than left-dominance and co-dominance.
- Our study was a cross-sectional study, so the outcomes of patients were unavailable.

For peer review only

## Introduction

Coronary artery disease (CAD) is one of the most common type of disease around the world<sup>1</sup>. It is recognised that obesity, blood pressure, smoking, diabetes, exercise, diet, cholesterol, and depression was associated with the incidence of CAD<sup>2</sup>. The severity of coronary artery stenosis was usually evaluated by Gensini score or SYNTAX score in clinical practice<sup>3</sup>. Several studies have shown that coronary artery dominance is associated with cardiovascular prognosis in patients with acute coronary syndrome<sup>4-7</sup>. Variation of coronary dominance includes left dominance (LD), right dominance (RD) and co-dominance (CD) based on the vascular supply of the posterior interventricular septum (IVS)<sup>8,9</sup>. In the general population, RD is most prevalent of approximately 70% population, while LD occurs in about 10% of cases and co-dominance is present in 20% of cases<sup>10</sup>. LD was found to be associated with increased long-term mortality in patients with CAD<sup>11,12</sup>. However, little is known about the role of RD in the CAD. Previous study showed that RD, LD and CD have a prevalence of approximately 82-89%, 5-12% and 3-7% respectively in hospital population<sup>4,13-15</sup>. There seems to have different distribution of coronary dominance between general population and CAD patients. Therefore, we conducted this study to investigate whether patients with right coronary dominance was associated with CAD and its severity.

## Methods

### *Study population*

1  
2  
3 1654 in-hospital patients, who underwent coronary angiography (CAG) during their  
4  
5 hospital stay, were recruited from the CAG database of the First Affiliated Hospital of  
6  
7 Xi'an Jiaotong University between July 2015 and February 2017. All patients  
8  
9 included in this study because they had standard clinical indications for CAG.  
10  
11 Exclusion criteria were (1) previous coronary artery bypass graft operation or CAG,  
12  
13 (2) those with chronic and systemic disease, and (3) incomplete CAG reports and  
14  
15 medical records. All patients signed the informed consent during hospital, and their  
16  
17 records were anonymised and de-identified before analysis. The study protocol was  
18  
19 approved by the Ethics Committee of the First Affiliated Hospital, Xi'an Jiaotong  
20  
21 University.  
22  
23  
24  
25  
26  
27  
28  
29

### 30 *Patient and Public Involvement*

31  
32 Patients were not involved in the hypothesis, design, conduct and data analysis of this  
33  
34 study. And we will not disseminate the results of this study to participants.  
35  
36  
37  
38  
39

### 40 *Definitions*

41  
42 Hypertension was defined as office blood pressure over 140/90 mmHg or 24-hour  
43  
44 ambulatory blood pressure over 135/85 mmHg<sup>16</sup>. Diabetes mellitus was diagnosed as  
45  
46 patients with a fasting plasma glucose level  $\geq 7.0$  mmol/L (126 mg/dL) or two-hour  
47  
48 post-load plasma glucose level  $\geq 11.0$  mmol/L (200 mg/dL)<sup>17</sup>. Smoking was defined as  
49  
50 ever smoked 100 cigarettes or currently smoking every day or some days<sup>18</sup>.  
51  
52  
53  
54  
55  
56  
57  
58  
59  
60

### *CAG results*

All patients underwent CAG using a standard clinical technique through femoral artery or radial artery approach<sup>19</sup>. The CAG report was written and checked by interventional cardiologists. The phenotype of coronary dominance was divided based on the CAG. The posterior descending artery was originated by the right coronary artery in patients with RD. The posterior descending artery diverged from left circumflex artery was defined as LD. Co-dominant anatomy was defined when the PDA originated from the right coronary artery (RCA) and a large posterolateral branch originated from the Left circumflex branch (LCx) reached near the posterior interventricular groove<sup>10, 13</sup>. The severity of CAD was evaluated with the Gensini score. In this scoring system, 0 indicates no abnormality, 1 represents stenosis  $\leq 25\%$ , 2 represents stenosis of 26-50%, 4 represents stenosis of 51-75%, 16 represents stenosis of 76-99%, and 32 represents complete occlusion. Then the score is multiplied by different factors according to the functional significance of the coronary artery. The evaluation of each segment was performed as the scores multiplied by 5 for the left main trunk, by 2.5 for the proximal LAD, by 1.5 for the middle LAD, by 1 for the distal LAD, by 1 for the first diagonal branch, by 0.5 for the second diagonal branch, by 2.5 for the proximal LCX, by 1 for the distal LCX and posterior descending branch, and by 0.5 for the posterior branch. While the right coronary artery was performed as the scores multiplied by 1 for the proximal, middle and distal RAD and posterior descending branch, and by 0.5 for the posterior branch. The final score was calculated by adding the scores of each segment.<sup>20-22</sup>. The patients were

1  
2  
3 then divided into four groups according to the total score (0–12, 13–24, 25–52 and  
4  
5  
6  $\geq 53$ )<sup>23</sup>.  
7  
8  
9

### 10 *Statistical analysis*

11  
12 All statistical analyses were made by SPSS version 24.0 (SPSS Inc., Xi'an Jiaotong  
13  
14 University, China). *P*-value <0.05 was considered statistically significant. The  
15  
16 continuous variables are presented as mean  $\pm$  standard. Categorical variables are  
17  
18 presented as number and percentages. Analysis of variance and the chi-square test  
19  
20 were used to compare variables between the subgroups of different grade of Gensini  
21  
22 score. Gensini score was divided into first grade (0-12.5), second grade (13-24.5),  
23  
24 third grade (25-52.5) and fourth grade ( $\geq 53$ ). Patients with LD or CD anatomies  
25  
26 were placed into the Left-CD group, while those with RD anatomy were included in  
27  
28 the RD group. A multiple linear regression analysis was performed to test the  
29  
30 association between severity of CAD and variables (age, gender, smoking status,  
31  
32 diabetes mellitus, hypertension, hyperlipidaemia, heart rate, family history of CAD,  
33  
34 SBP, DBP, and coronary dominance).  
35  
36  
37  
38  
39  
40  
41  
42  
43  
44

## 45 **Results**

### 46 *Patient characteristics*

47  
48 The study included 1654 patients (1235 males and 419 females, mean age  $59.4 \pm 10.4$ )  
49  
50 who underwent CAG. Patients were divided into four groups based on Gensini score  
51  
52 which were 0-12 (first grade; n=347), 13-24 (second grade; n=329), 25-52 (third  
53  
54  
55  
56  
57  
58  
59  
60



1  
2  
3 grade; n=486) and  $\geq 53$  (fourth grade; n=492). Gender, SBP, DBP, heart rate, diabetes  
4  
5 mellitus, hypertension, smoking, hyperlipidaemia, coronary vessel disease, history of  
6  
7 CAD and coronary dominance were compared in the four group. Baseline  
8  
9 characteristics was shown in Table 1 according to Gensini score.  
10  
11  
12  
13  
14

#### 15 16 *Association between Gensini score and coronary dominance*

17  
18 The total Gensini score was significantly higher in RD group than Left-CD group  
19  
20 (42.3 $\pm$ 33.6 vs. 36.3 $\pm$ 29.8; p=0.033). Besides, patients in the RD group have a higher  
21  
22 Gensini score than patients in the Left-CD groups in RCA (p<0.001) and posterior  
23  
24 descending artery (p=0.013) (Table 2). In addition, RD tended to have higher  
25  
26 proportion in third and fourth grade of Gensini score (Figure 1).  
27  
28  
29  
30  
31  
32

33 Univariate linear regression analysis showed that right dominance, age, gender,  
34  
35 diabetes and heart rate were associated with increasing Gensini score (Table 3). After  
36  
37 adjusted for age, gender, diabetes and heart rate, right dominance ( $\beta$  6.699, 95%  
38  
39 confidence interval [CI] 1.193-12.205, p=0.017) was positively associated with  
40  
41 Gensini score of patients (Table 4). Final multiple linear regression model also  
42  
43 showed a positive correlation between right dominance and Gensini score.  
44  
45  
46  
47  
48  
49

#### 50 **Discussion**

51  
52 According to the blood supply of the posterior interventricular septum using CAG or  
53  
54 computed tomography coronary angiography, coronary circulation is categorised as  
55  
56  
57  
58  
59  
60

1  
2  
3 right dominance, left dominance, and co-dominance<sup>4</sup>. Previous studies have showed  
4 that coronary artery dominance was closely related to cardiovascular outcomes<sup>4</sup>. A  
5  
6 study of 1131 patient showed that LD was associated with an increased risk of 30-day  
7  
8 mortality and early reinfarction after ST-elevated myocardial infarction<sup>24</sup>. Goldberg et  
9  
10 al. demonstrated that LD was a risk factor for increased long-term mortality in  
11  
12 patients with acute coronary syndrome<sup>7</sup>. However, little is known about the role of  
13  
14 right dominance in the CAD. In this study, we found that patient with right dominance  
15  
16 was associated with the severity of CAD. The results indicated that RD was more  
17  
18 prone to have serious CAD stenosis and may serve as a marker of CAD severity.  
19  
20  
21  
22  
23  
24  
25  
26  
27

28 In the general population, RD anatomy has a prevalence of approximately 70%<sup>10</sup>.  
29  
30 Besides, LD and RD have a reported prevalence of approximately 5-12% and 82-89%  
31  
32 respectively, whereas CD is found in 3-7% of individuals based on hospital  
33  
34 population<sup>5-7, 25, 26</sup>. The proportion of RD, LD and CD in our study was 90.6%, 6.7%  
35  
36 and 2.7% respectively. The phenomenon reminds us that RD group may had higher  
37  
38 percentage in hospital population than general population.  
39  
40  
41  
42  
43  
44

45 Gensini score is a quick and easy way to quantify the severity of CAD in the clinical  
46  
47 work. Therefore, we used this scoring system to further investigate the association  
48  
49 between coronary dominance and CAD. In our study, the total Gensini score of RD  
50  
51 patient was obviously higher than patient with Left-CD. After multiple lineal  
52  
53 regression, RD showed a positive correlation with Gensini score. A previous study  
54  
55  
56  
57  
58  
59  
60

1  
2  
3 with a large population found that RD patient had a higher prevalence of triple vessel  
4 disease than patient with LD<sup>26</sup>. The result indicated that patient with RD tended to  
5  
6 have more serious coronary stenosis. At present, the mechanism between right  
7  
8 dominance and severity of CAD was still not known. Therefore, further researches are  
9  
10 needed to detect the underlying mechanism for developing more severe lesions in the  
11  
12 right dominance.  
13  
14  
15  
16  
17  
18  
19

20 Some potential limitations in this study should be noted. First, our finding was based  
21  
22 on a Northern Chinese population. Therefore, the results should not be extended to all  
23  
24 ethnic groups. Second, our data was obtained from hospital database, so the outcomes  
25  
26 of patients were unavailable. Finally, the study population was relatively small, which  
27  
28 led to a smaller group of individuals with left dominance and co-dominance.  
29  
30  
31  
32

### 33 **Conclusion**

34  
35  
36 The present study reported that RD patient had a significantly higher proportion of  
37  
38 serious coronary stenosis than patient with LD and CD. Right coronary dominance  
39  
40 was associated with the severity of CAD. A prospective, multi-centre cohort study  
41  
42 may further validate our findings.  
43  
44  
45  
46  
47  
48  
49  
50  
51  
52  
53  
54  
55  
56  
57  
58  
59  
60

### **Contributors**

All authors contributed to the study design, writing and review of the report. B.Y., J.Y., Q.M. and L.Y. collected the data. B.Z and Y.F did the primary data analysis and J.Y., B.Y. and X.M participated in further data analysis. X.M. handled supervision in our study. All authors approved the final version of the report. We also thank Qiaolong Hu, Jinni Li, Jian Kang, Chuance Yang, Li Bai, Yufeng Wang, and Wan Gao from Xi'an Jiaotong University School of Medicine for contributing to the data collection. We also acknowledge the support from the patients who participated in our research.

### **Funding**

This research was supported by National Natural Science Foundation of China (Grant number: No. 81471374) and the Clinical Research Award of the First Affiliated Hospital of Xi'an Jiaotong University, China (Grant number: No. XJTU1AF-CRF-2016-005).

### **Competing Interests**

The Authors declare that there is no conflict of interest.

## References

1. Ross R. The pathogenesis of atherosclerosis: a perspective for the 1990s. *Nature*. 1993;362(6423):801-9.
2. Drozda J, Jr., Messer JV, Spertus J, et al. ACCF/AHA/AMA-PCPI 2011 performance measures for adults with coronary artery disease and hypertension: a report of the American College of Cardiology Foundation/American Heart Association Task Force on Performance Measures and the American Medical Association-Physician Consortium for Performance Improvement. *Circulation*. 2011;124(2):248-70.
3. Sinning C, Lillpopp L, Appelbaum S, et al. Angiographic score assessment improves cardiovascular risk prediction: the clinical value of SYNTAX and Gensini application. *Clin Res Cardiol*. 2013;102(7):495-503.
4. Veltman CE, de Graaf FR, Schuijf JD, et al. Prognostic value of coronary vessel dominance in relation to significant coronary artery disease determined with non-invasive computed tomography coronary angiography. *Eur Heart J*. 2012;33(11):1367-77.
5. Kuno T, Numasawa Y, Miyata H, et al. Impact of coronary dominance on in-hospital outcomes after percutaneous coronary intervention in patients with acute coronary syndrome. *PLoS One*. 2013;8(8):e72672.
6. Parikh NI, Honeycutt EF, Roe MT, et al. Left and codominant coronary artery circulations are associated with higher in-hospital mortality among patients undergoing percutaneous coronary intervention for acute coronary syndromes: report From the National Cardiovascular Database Cath Percutaneous Coronary Intervention (CathPCI) Registry. *Circ Cardiovasc Qual Outcomes*. 2012;5(6):775-82.
7. Goldberg A, Southern DA, Galbraith PD, et al. Coronary dominance and prognosis of patients with acute coronary syndrome. *Am Heart J*. 2007;154(6):1116-22.
8. Altin C, Kanyilmaz S, Koc S, et al. Coronary anatomy, anatomic variations and anomalies: a retrospective coronary angiography study. *Singapore Med J*. 2015;56(6):339-45.
9. Abuchaim DC, Tanamati C, Jatene MB, et al. Coronary dominance patterns in hypoplastic left heart syndrome. *Rev Bras Cir Cardiovasc*. 2011;26(4):604-8.
10. Pelter MM, Al-Zaiti SS, Carey MG. Coronary artery dominance. *Am J Crit Care*. 2011;20(5):401-2.
11. Abu-Assi E, Castineira-Busto M, Gonzalez-Salvado V, et al. Coronary Artery Dominance and Long-term Prognosis in Patients With ST-segment Elevation Myocardial Infarction Treated With Primary Angioplasty. *Rev Esp Cardiol (Engl Ed)*. 2016;69(1):19-27.
12. Waziri H, Jorgensen E, Kelbaek H, et al. Acute myocardial infarction and lesion location in the left circumflex artery: importance of coronary artery dominance. *EuroIntervention*. 2015;11(5).
13. Veltman CE, van der Hoeven BL, Hoogslag GE, et al. Influence of coronary vessel dominance on short- and long-term outcome in patients after ST-segment elevation myocardial infarction. *Eur Heart J*. 2015;36(17):1023-30.
14. Omerbasic E, Hasanovic A, Omerbasic A, et al. Prognostic value of anatomical dominance of coronary circulation in patients with surgical myocardial revascularization. *Med Arch*. 2015;69(1):6-9.
15. Lam MK, Tandjung K, Sen H, et al. Coronary artery dominance and the risk of adverse clinical events following percutaneous coronary intervention: insights from the prospective, randomised TWENTE trial. *EuroIntervention*. 2015;11(2):180-7.

16. Mancia G, Fagard R, Narkiewicz K, et al. 2013 ESH/ESC Guidelines for the management of arterial hypertension: the Task Force for the management of arterial hypertension of the European Society of Hypertension (ESH) and of the European Society of Cardiology (ESC). *J Hypertens*. 2013;31(7):1281-357.
17. Vijan S. Type 2 diabetes. *Ann Intern Med*. 2010;152(5):ITC31-15; quiz ITC316.
18. Hou X, Qiu J, Chen P, et al. Cigarette Smoking Is Associated with a Lower Prevalence of Newly Diagnosed Diabetes Screened by OGTT than Non-Smoking in Chinese Men with Normal Weight. *PLoS One*. 2016;11(3):e0149234.
19. Levine GN, Bates ER, Blankenship JC, et al. 2011 ACCF/AHA/SCAI Guideline for Percutaneous Coronary Intervention: a report of the American College of Cardiology Foundation/American Heart Association Task Force on Practice Guidelines and the Society for Cardiovascular Angiography and Interventions. *Circulation*. 2011;124(23):e574-651.
20. Wang GN, Sun K, Hu DL, et al. Serum cystatin C levels are associated with coronary artery disease and its severity. *Clin Biochem*. 2014;47(16-17):176-81.
21. Yongsakulchai P, Settasatian C, Settasatian N, et al. Association of combined genetic variations in PPARgamma, PGC-1alpha, and LXRAalpha with coronary artery disease and severity in Thai population. *Atherosclerosis*. 2016;248:140-8.
22. Liu H, Guan S, Fang W, et al. Associations between pentraxin 3 and severity of coronary artery disease. *BMJ Open*. 2015;5(4):e007123.
23. Ndrepepa G, Tada T, Fusaro M, et al. Association of coronary atherosclerotic burden with clinical presentation and prognosis in patients with stable and unstable coronary artery disease. *Clin Res Cardiol*. 2012;101(12):1003-11.
24. Stribling WK, Kontos MC, Abbate A, et al. Clinical outcomes in patients with acute left circumflex/obtuse marginal occlusion presenting with myocardial infarction. *J Interv Cardiol*. 2011;24(1):27-33.
25. Eren S, Bayram E, Fil F, et al. An investigation of the association between coronary artery dominance and coronary artery variations with coronary arterial disease by multidetector computed tomographic coronary angiography. *J Comput Assist Tomogr*. 2008;32(6):929-33.
26. Vasheghani-Farahani A, Kassaian SE, Yaminisharif A, et al. The association between coronary arterial dominance and extent of coronary artery disease in angiography and paraclinical studies. *Clin Anat*. 2008;21(6):519-23.

## Figure Legends

**Figure 1** Distribution of RD and Left-CD group in different grade of Gensini score.

For peer review only

Table 1 Baseline characteristics of patients

| <b>Clinical variables</b>            | Total<br>(n=1654) | First<br>(n=347) | Second<br>(n=329) | Third<br>(n=486) | Fourth<br>(n=492) |
|--------------------------------------|-------------------|------------------|-------------------|------------------|-------------------|
| Age (years)                          | 59.4±10.4         | 58.5±9.9         | 59.1±10.6         | 59.3±10.6        | 60.2±10.4         |
| Gender, n (%)                        |                   |                  |                   |                  |                   |
| Male                                 | 1235 (74.7)       | 225 (64.8)       | 239 (72.6)        | 368 (75.7)       | 403 (81.9)        |
| Female                               | 419 (25.3)        | 122 (35.2)       | 90 (27.4)         | 118 (24.3)       | 89 (18.1)         |
|                                      |                   | 135.8±19.        |                   |                  |                   |
| Baseline SBP (mmHg)                  | 134.6±21.0        | 9                | 135.8±20.4        | 134.4±20.6       | 133.1±22.6        |
| Baseline DBP (mmHg)                  | 78.3±12.3         | 79.1±12.9        | 78.5±12.0         | 77.7±11.3        | 78.3±12.8         |
| Heart rate (bpm)                     | 75.5±13.2         | 74.3±12.1        | 75.3±14.0         | 75.4±12.6        | 76.6±14.1         |
| CAD risk factors, n (%)              |                   |                  |                   |                  |                   |
| Diabetes Mellitus                    | 321 (19.4)        | 33 (9.5)         | 65 (19.8)         | 102 (21.0)       | 121 (24.6)        |
| Hypertension                         | 870 (52.6)        | 174 (50.1)       | 175 (53.2)        | 263 (54.1)       | 258 (52.4)        |
| Current smoking                      | 841 (50.8)        | 156 (45.0)       | 170 (51.7)        | 262 (53.9)       | 253 (51.4)        |
| Hyperlipidemia                       | 182 (11.0)        | 42 (12.1)        | 37 (11.2)         | 51 (10.5)        | 52 (10.6)         |
| Dignosis, n (%)                      |                   |                  |                   |                  |                   |
| AMI                                  | 730 (44.1)        | 44 (12.7)        | 97 (29.5)         | 251 (51.6)       | 338 (68.7)        |
| Unstable angina                      | 311 (18.8)        | 67 (19.3)        | 83 (25.2)         | 81 (16.7)        | 80 (16.3)         |
| CAD on CAG, n (%)                    |                   |                  |                   |                  |                   |
| One vessel disease ( $\geq$<br>50%)  | 465 (28.1)        | 239 (68.9)       | 124 (37.7)        | 76 (15.6)        | 26 (5.3)          |
| Multivessel disease<br>( $\geq$ 50%) | 1189 (71.9)       | 108 (31.1)       | 205 (62.3)        | 410 (84.4)       | 466 (94.7)        |
| History, n (%)                       |                   |                  |                   |                  |                   |
| Prior MI                             | 134 (8.1)         | 9 (2.6)          | 16 (4.9)          | 49 (10.1)        | 60 (12.2)         |
| Family history of<br>CAD             | 475 (28.7)        | 107 (30.8)       | 98 (29.8)         | 126 (25.9)       | 144 (29.3)        |
| Coronary dominance, n<br>(%)         |                   |                  |                   |                  |                   |



|        |             |            |            |            |            |
|--------|-------------|------------|------------|------------|------------|
| Right- | 1500 (90.6) | 304 (87.6) | 297 (90.3) | 445 (91.5) | 454 (92.3) |
| Left-  | 110 (6.7)   | 30 (8.7)   | 22 (6.7)   | 30 (6.2)   | 28 (5.7)   |
| Co-    | 44 (2.7)    | 13 (3.7)   | 10 (3.0)   | 11 (2.3)   | 10 (2.0)   |

Four groups were based on Gensini score: first grade (0-12.5), second grade (13-24.5), third grade (25-52.5) and fourth grade ( $\geq 53$ ). Results are presented as mean  $\pm$  standard deviation or n (%). AMI, acute myocardial infarction; CAD, coronary artery disease; CAG, coronary artery angiography; DBP, diastolic blood pressure; MI, myocardial infarction; SBP, systolic blood pressure.

For peer review only

Table 2 Gensini score and coronary dominance

|                             | RD (n=1500) | Left+CD (n=154) | P      |
|-----------------------------|-------------|-----------------|--------|
| Age (years)                 | 59.4±10.4   | 59.2±9.5        | 0.769  |
| Gender, n (%)               |             |                 | 0.242  |
| Male                        | 1114 (74.3) | 121 (78.6)      |        |
| Female                      | 386 (25.7)  | 33 (21.4)       |        |
| Baseline SBP (mmHg)         | 134.8±21.2  | 132.6±19.5      | 0.231  |
| Baseline DBP (mmHg)         | 78.4±12.4   | 78.1±11.0       | 0.819  |
| Heart rate (bpm)            | 75.4±13.1   | 76.5±14.8       | 0.341  |
| CAD risk factors, n (%)     |             |                 |        |
| Diabetes Mellitus           | 295 (19.7)  | 26 (16.9)       | 0.406  |
| Hypertension                | 797 (53.1)  | 73 (47.4)       | 0.175  |
| Current smoking             | 758 (50.5)  | 83 (53.9)       | 0.427  |
| Hyperlipidemia              | 164 (10.9)  | 18 (11.7)       | 0.776  |
| Total Gensini score         | 42.3±33.6   | 36.3±29.8       | 0.033  |
| LM                          | 1.7±7.3     | 1.7±7.7         | 0.935  |
| LAD                         | 21.1±21.1   | 19.7±20.0       | 0.433  |
| RCA                         | 7.8±10.8    | 4.7±8.5         | <0.001 |
| LCX                         | 9.1±14.5    | 8.2±12.4        | 0.424  |
| Diagonal branch             | 1.3±2.7     | 1.1±2.4         | 0.402  |
| Septal branch               | 0.1±0.5     | 0.1±0.8         | 0.491  |
| OM                          | 0.7±2.2     | 0.6±2.0         | 0.848  |
| Posterior descending artery | 0.6±2.1     | 0.2±1.5         | 0.013  |

LAD, left anterior descending branch; LCx, left circumflex branch; LM, left main coronary artery; OM, obtuse marginal branch; RCA, right coronary artery.

Table 3 Univariate linear regression analysis for Gensini score

| Variable              | $\beta$ (95% CI)         | P      |
|-----------------------|--------------------------|--------|
| Right Dominance       | 5.991 (0.474 to 11.508)  | 0.033  |
| Age                   | 0.187 (0.033 to 0.342)   | 0.017  |
| Male                  | 9.811 (6.150 to 13.472)  | <0.001 |
| Smoking               | 1.098 (-2.113 to 4.309)  | 0.503  |
| Hypertension          | 1.033 (-2.182 to 4.247)  | 0.529  |
| Diabetes Mellitus     | 8.408 (4.369 to 12.447)  | <0.001 |
| Hyperlipidemia        | -2.038 (-7.167 to 3.091) | 0.436  |
| Family history of CAD | -0.652 (-4.200 to 2.896) | 0.719  |
| SBP                   | -0.065 (-0.142 to 0.013) | 0.100  |
| DBP                   | -0.008 (-0.141 to 0.125) | 0.911  |
| Heart rate            | 0.148 (0.025 to 0.271)   | 0.018  |

CAD, coronary artery disease; DBP, diastolic blood pressure; SBP, systolic blood pressure.

Table 4 Multivariate linear regression analysis for Gensini score

| Variable   | $\beta$ (95% CI)        | P value |
|------------|-------------------------|---------|
| Unadjusted | 5.991 (0.474 to 11.508) | 0.033   |
| Model 1    | 6.404 (0.945 to 11.862) | 0.022   |
| Model 2    | 6.699 (1.193 to 12.205) | 0.017   |
| Model 3    | 6.829 (1.312 to 12.346) | 0.015   |

Model 1 adjusted age and gender

Model 2 adjusted age and gender, diabetes, heart rate

Model 3 adjusted age and gender, diabetes, heart rate, smoking, hypertension, hyperlipidemia, history of CAD, SBP, DBP



Figure 1 Distribution of RD and Left-CD group in different grade of Gensini score.

67x45mm (300 x 300 DPI)

**STROBE 2007 (v4) Statement—Checklist of items that should be included in reports of *cross-sectional studies***

| Section/Topic                | Item # | Recommendation                                                                                                                                                                       | Reported on page # |
|------------------------------|--------|--------------------------------------------------------------------------------------------------------------------------------------------------------------------------------------|--------------------|
| <b>Title and abstract</b>    | 1      | (a) Indicate the study’s design with a commonly used term in the title or the abstract                                                                                               | 1                  |
|                              |        | (b) Provide in the abstract an informative and balanced summary of what was done and what was found                                                                                  | 2                  |
| <b>Introduction</b>          |        |                                                                                                                                                                                      |                    |
| Background/rationale         | 2      | Explain the scientific background and rationale for the investigation being reported                                                                                                 | 4                  |
| Objectives                   | 3      | State specific objectives, including any prespecified hypotheses                                                                                                                     | 4                  |
| <b>Methods</b>               |        |                                                                                                                                                                                      |                    |
| Study design                 | 4      | Present key elements of study design early in the paper                                                                                                                              | 5                  |
| Setting                      | 5      | Describe the setting, locations, and relevant dates, including periods of recruitment, exposure, follow-up, and data collection                                                      | 5                  |
| Participants                 | 6      | (a) Give the eligibility criteria, and the sources and methods of selection of participants                                                                                          | 5                  |
| Variables                    | 7      | Clearly define all outcomes, exposures, predictors, potential confounders, and effect modifiers. Give diagnostic criteria, if applicable                                             | 5-6                |
| Data sources/<br>measurement | 8*     | For each variable of interest, give sources of data and details of methods of assessment (measurement). Describe comparability of assessment methods if there is more than one group | 5-6                |
| Bias                         | 9      | Describe any efforts to address potential sources of bias                                                                                                                            | 6-7                |
| Study size                   | 10     | Explain how the study size was arrived at                                                                                                                                            | 5                  |
| Quantitative variables       | 11     | Explain how quantitative variables were handled in the analyses. If applicable, describe which groupings were chosen and why                                                         | 6-7                |
| Statistical methods          | 12     | (a) Describe all statistical methods, including those used to control for confounding                                                                                                | 6-7                |
|                              |        | (b) Describe any methods used to examine subgroups and interactions                                                                                                                  | N/A                |
|                              |        | (c) Explain how missing data were addressed                                                                                                                                          | N/A                |
|                              |        | (d) If applicable, describe analytical methods taking account of sampling strategy                                                                                                   | N/A                |
|                              |        | (e) Describe any sensitivity analyses                                                                                                                                                | N/A                |
| <b>Results</b>               |        |                                                                                                                                                                                      |                    |

|                          |     |                                                                                                                                                                                                              |     |
|--------------------------|-----|--------------------------------------------------------------------------------------------------------------------------------------------------------------------------------------------------------------|-----|
| Participants             | 13* | (a) Report numbers of individuals at each stage of study—eg numbers potentially eligible, examined for eligibility, confirmed eligible, included in the study, completing follow-up, and analysed            | 7   |
|                          |     | (b) Give reasons for non-participation at each stage                                                                                                                                                         | N/A |
|                          |     | (c) Consider use of a flow diagram                                                                                                                                                                           | N/A |
| Descriptive data         | 14* | (a) Give characteristics of study participants (eg demographic, clinical, social) and information on exposures and potential confounders                                                                     | 7   |
|                          |     | (b) Indicate number of participants with missing data for each variable of interest                                                                                                                          | N/A |
| Outcome data             | 15* | Report numbers of outcome events or summary measures                                                                                                                                                         | 7   |
| Main results             | 16  | (a) Give unadjusted estimates and, if applicable, confounder-adjusted estimates and their precision (eg, 95% confidence interval). Make clear which confounders were adjusted for and why they were included | 7-8 |
|                          |     | (b) Report category boundaries when continuous variables were categorized                                                                                                                                    | 7-8 |
|                          |     | (c) If relevant, consider translating estimates of relative risk into absolute risk for a meaningful time period                                                                                             | N/A |
| Other analyses           | 17  | Report other analyses done—eg analyses of subgroups and interactions, and sensitivity analyses                                                                                                               | N/A |
| <b>Discussion</b>        |     |                                                                                                                                                                                                              |     |
| Key results              | 18  | Summarise key results with reference to study objectives                                                                                                                                                     | 8   |
| Limitations              | 19  | Discuss limitations of the study, taking into account sources of potential bias or imprecision. Discuss both direction and magnitude of any potential bias                                                   | 9   |
| Interpretation           | 20  | Give a cautious overall interpretation of results considering objectives, limitations, multiplicity of analyses, results from similar studies, and other relevant evidence                                   | 8-9 |
| Generalisability         | 21  | Discuss the generalisability (external validity) of the study results                                                                                                                                        | 10  |
| <b>Other information</b> |     |                                                                                                                                                                                                              |     |
| Funding                  | 22  | Give the source of funding and the role of the funders for the present study and, if applicable, for the original study on which the present article is based                                                | 11  |

\*Give information separately for cases and controls in case-control studies and, if applicable, for exposed and unexposed groups in cohort and cross-sectional studies.

**Note:** An Explanation and Elaboration article discusses each checklist item and gives methodological background and published examples of transparent reporting. The STROBE checklist is best used in conjunction with this article (freely available on the Web sites of PLoS Medicine at <http://www.plosmedicine.org/>, Annals of Internal Medicine at <http://www.annals.org/>, and Epidemiology at <http://www.epidem.com/>). Information on the STROBE Initiative is available at [www.strobe-statement.org](http://www.strobe-statement.org).

# BMJ Open

## Association of coronary dominance with the severity of coronary artery disease: a cross-sectional study in Shaanxi Province, China

|                                 |                                                                                                                                                                                                                                                                                                                                                                                                                                                                                                                                                                                                               |
|---------------------------------|---------------------------------------------------------------------------------------------------------------------------------------------------------------------------------------------------------------------------------------------------------------------------------------------------------------------------------------------------------------------------------------------------------------------------------------------------------------------------------------------------------------------------------------------------------------------------------------------------------------|
| Journal:                        | <i>BMJ Open</i>                                                                                                                                                                                                                                                                                                                                                                                                                                                                                                                                                                                               |
| Manuscript ID                   | bmjopen-2017-021292.R2                                                                                                                                                                                                                                                                                                                                                                                                                                                                                                                                                                                        |
| Article Type:                   | Research                                                                                                                                                                                                                                                                                                                                                                                                                                                                                                                                                                                                      |
| Date Submitted by the Author:   | 19-Jun-2018                                                                                                                                                                                                                                                                                                                                                                                                                                                                                                                                                                                                   |
| Complete List of Authors:       | Yan, Bin; The First Affiliated Hospital of Xi'an Jiaotong University, Yang, Jian; the First Affiliated Hospital of Xi'an Jiaotong University Fan, Yajuan; the First Affiliated Hospital of Xi'an Jiaotong University Zhao, Binbin; the First Affiliated Hospital of Xi'an Jiaotong University, Department of Psychiatry<br>Ma, Qingyan; the First Affiliated Hospital of Xi'an Jiaotong University Yang, Li-Hong; The First Affiliated Hospital of Xi'an Jiaotong University, Clinical Research Center<br>Ma, Xian-Cang; The First Affiliated Hospital of Xi'an Jiaotong University, Clinical Research Center |
| <b>Primary Subject Heading</b>: | Cardiovascular medicine                                                                                                                                                                                                                                                                                                                                                                                                                                                                                                                                                                                       |
| Secondary Subject Heading:      | Cardiovascular medicine                                                                                                                                                                                                                                                                                                                                                                                                                                                                                                                                                                                       |
| Keywords:                       | Coronary heart disease < CARDIOLOGY, Vascular medicine < INTERNAL MEDICINE, Coronary intervention < CARDIOLOGY                                                                                                                                                                                                                                                                                                                                                                                                                                                                                                |
|                                 |                                                                                                                                                                                                                                                                                                                                                                                                                                                                                                                                                                                                               |

SCHOLARONE™  
Manuscripts

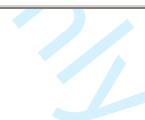



1  
2  
3  
4 **Association of coronary dominance with the severity of coronary**  
5  
6 **artery disease: a cross-sectional study in Shaanxi Province, China**  
7

8 Bin Yan, MD, Jian Yang, MD, Yajuan Fan, MD, Binbin Zhao, MD, Qingyan Ma, MD,  
9

10 Lihong Yang, MD, Xiancang Ma MD, PHD  
11

12  
13 From the Department of Clinical Research Center (BY, JY, LY), and the Department  
14  
15 of Psychiatry (BZ, YF, QM, XM), the First Affiliated Hospital of Xi'an Jiaotong  
16  
17 University, Xi'an, China  
18  
19

20 **Correspondence to:** Prof. Xiancang Ma, Department of Psychiatry, the First  
21

22  
23 Affiliated Hospital of Xi'an Jiaotong University, Xi'an, China; Phone: +86 8532 3614;  
24

25 Email: [maxiancang@163.com](mailto:maxiancang@163.com)  
26  
27  
28  
29  
30  
31  
32  
33  
34  
35  
36  
37  
38  
39  
40  
41  
42  
43  
44  
45  
46  
47  
48  
49  
50  
51  
52  
53  
54  
55  
56  
57  
58  
59  
60

## Abstract

**Objectives:** To investigate whether coronary artery dominance is associated with the severity of coronary artery disease (CAD).

**Design:** cross-sectional study

**Setting:** Single centre

**Participants:** Between July 2015 and February 2017, 1654 patients who underwent coronary angiography (CAG) were recruited in this cross-sectional study.

**Measurement and methods:** Based on the CAG results, patients were classified as left dominance (LD), right dominance (RD), and co-dominance (CD). Multiple linear regression analysis was performed to test the association between severity of coronary artery disease (CAD) and coronary dominance.

**Results:** The total Gensini score was significantly higher in RD group than Left-CD group ( $42.3 \pm 33.6$  vs.  $36.3 \pm 29.8$ ;  $p=0.033$ ). After adjusting for potential confounding factors, results of multivariate linear regression showed that right dominance was associated with the severity of CAD ( $\beta$  6.699, 95% confidence interval [CI] 1.193-12.205,  $p=0.017$ ).

**Conclusions:** These results suggest that right coronary dominance was associated with the severity of CAD.

**Keywords:** coronary dominance, Gensini score, cross-sectional study, coronary angiography

### Strengths and limitations of this study

- This is the first study to investigate the association of right coronary dominance with the severity of coronary artery disease.
- This cross-sectional study included 1654 patients who underwent coronary angiography during their hospital stay in Northern China.
- The patients were recruited from a single centre, therefore the study population of RD group and CD group was relatively small.

## Introduction

Coronary artery disease (CAD) is one of the most common type of disease around the world<sup>1</sup>. It is recognised that obesity, blood pressure, smoking, diabetes, exercise, diet, cholesterol, and depression was associated with the incidence of CAD<sup>2</sup>. The severity of coronary artery stenosis was usually evaluated by Gensini score or SYNTAX score in clinical practice<sup>3</sup>. Several studies have shown that coronary artery dominance is associated with cardiovascular prognosis in patients with acute coronary syndrome<sup>4-7</sup>. Variation of coronary dominance includes left dominance (LD), right dominance (RD) and co-dominance (CD) based on the vascular supply of the posterior interventricular septum (IVS)<sup>8,9</sup>. In the general population, RD is most prevalent of approximately 70% population, while LD occurs in about 10% of cases and co-dominance is present in 20% of cases<sup>10</sup>. LD was found to be associated with increased long-term mortality in patients with CAD<sup>11,12</sup>. However, little is known about the role of RD in the CAD. Previous study showed that RD, LD and CD have a prevalence of approximately 82-89%, 5-12% and 3-7% respectively in hospital population<sup>4,13-15</sup>. There seems to have different distribution of coronary dominance between general population and CAD patients. Therefore, we conducted this study to investigate whether patients with right coronary dominance was associated with CAD and its severity.

## Methods

### *Study population*

1  
2  
3 1654 in-hospital patients, who underwent coronary angiography (CAG) during their  
4  
5 hospital stay, were recruited from the CAG database of the First Affiliated Hospital of  
6  
7 Xi'an Jiaotong University between July 2015 and February 2017. All patients  
8  
9 included in this study because they had standard clinical indications for CAG.  
10  
11 Exclusion criteria were (1) previous coronary artery bypass graft operation or CAG,  
12  
13 (2) those with chronic and systemic disease, and (3) incomplete CAG reports and  
14  
15 medical records. All patients signed the informed consent during hospital, and their  
16  
17 records were anonymised and de-identified before analysis. The study protocol was  
18  
19 approved by the Ethics Committee of the First Affiliated Hospital, Xi'an Jiaotong  
20  
21 University.  
22  
23  
24  
25  
26  
27  
28  
29

### 30 *Patient and Public Involvement*

31  
32 Patients were not involved in the hypothesis, design, conduct and data analysis of this  
33  
34 study. And we will not disseminate the results of this study to participants.  
35  
36  
37  
38  
39

### 40 *Definitions*

41  
42 Hypertension was defined as office blood pressure over 140/90 mmHg or 24-hour  
43  
44 ambulatory blood pressure over 135/85 mmHg<sup>16</sup>. Diabetes mellitus was diagnosed as  
45  
46 patients with a fasting plasma glucose level  $\geq 7.0$  mmol/L (126 mg/dL) or two-hour  
47  
48 post-load plasma glucose level  $\geq 11.0$  mmol/L (200 mg/dL)<sup>17</sup>. Smoking was defined as  
49  
50 ever smoked 100 cigarettes or currently smoking every day or some days<sup>18</sup>.  
51  
52  
53  
54  
55  
56  
57  
58  
59  
60

### *CAG results*

All patients underwent CAG using a standard clinical technique through femoral artery or radial artery approach<sup>19</sup>. The CAG report was written and checked by interventional cardiologists. The phenotype of coronary dominance was divided based on the CAG. The posterior descending artery was originated by the right coronary artery in patients with RD. The posterior descending artery diverged from left circumflex artery was defined as LD. Co-dominant anatomy was defined when the PDA originated from the right coronary artery (RCA) and a large posterolateral branch originated from the Left circumflex branch (LCx) reached near the posterior interventricular groove<sup>10, 13</sup>. The severity of CAD was evaluated with the Gensini score. In this scoring system, 0 indicates no abnormality, 1 represents stenosis  $\leq 25\%$ , 2 represents stenosis of 26-50%, 4 represents stenosis of 51-75%, 16 represents stenosis of 76-99%, and 32 represents complete occlusion. Then the score is multiplied by different factors according to the functional significance of the coronary artery. The evaluation of each segment was performed as the scores multiplied by 5 for the left main trunk, by 2.5 for the proximal LAD, by 1.5 for the middle LAD, by 1 for the distal LAD, by 1 for the first diagonal branch, by 0.5 for the second diagonal branch, by 2.5 for the proximal LCX, by 1 for the distal LCX and posterior descending branch, and by 0.5 for the posterior branch. While the right coronary artery was performed as the scores multiplied by 1 for the proximal, middle and distal RAD and posterior descending branch, and by 0.5 for the posterior branch. The final score was calculated by adding the scores of each segment.<sup>20-22</sup>. The patients were

1  
2  
3 then divided into four groups according to the total score (0–12, 13–24, 25–52 and  
4  
5  
6  $\geq 53$ )<sup>23</sup>.  
7  
8  
9

### 10 *Statistical analysis*

11  
12 All statistical analyses were made by SPSS version 24.0 (SPSS Inc., Xi'an Jiaotong  
13  
14 University, China). *P*-value <0.05 was considered statistically significant. The  
15  
16 continuous variables are presented as mean  $\pm$  standard. Categorical variables are  
17  
18 presented as number and percentages. Analysis of variance and the chi-square test  
19  
20 were used to compare variables between the subgroups of different grade of Gensini  
21  
22 score. Gensini score was divided into first grade (0-12.5), second grade (13-24.5),  
23  
24 third grade (25-52.5) and fourth grade ( $\geq 53$ ). Patients with LD or CD anatomies  
25  
26 were placed into the Left-CD group, while those with RD anatomy were included in  
27  
28 the RD group. A multiple linear regression analysis was performed to test the  
29  
30 association between severity of CAD and variables (age, gender, smoking status,  
31  
32 diabetes mellitus, hypertension, hyperlipidaemia, heart rate, family history of CAD,  
33  
34 SBP, DBP, and coronary dominance).  
35  
36  
37  
38  
39  
40  
41  
42  
43  
44

## 45 **Results**

### 46 *Patient characteristics*

47  
48 The study included 1654 patients (1235 males and 419 females, mean age  $59.4 \pm 10.4$ )  
49  
50 who underwent CAG. Patients were divided into four groups based on Gensini score  
51  
52 which were 0-12 (first grade; n=347), 13-24 (second grade; n=329), 25-52 (third  
53  
54  
55  
56  
57  
58  
59  
60

1  
2  
3 grade; n=486) and  $\geq 53$  (fourth grade; n=492). Gender, SBP, DBP, heart rate, diabetes  
4  
5 mellitus, hypertension, smoking, hyperlipidaemia, coronary vessel disease, history of  
6  
7 CAD and coronary dominance were compared in the four group. Baseline  
8  
9 characteristics was shown in Table 1 according to Gensini score.  
10  
11  
12  
13  
14

#### 15 16 *Association between Gensini score and coronary dominance*

17  
18 The total Gensini score was significantly higher in RD group than Left-CD group  
19  
20 (42.3 $\pm$ 33.6 vs. 36.3 $\pm$ 29.8; p=0.033). Besides, patients in the RD group have a higher  
21  
22 Gensini score than patients in the Left-CD groups in RCA (p<0.001) and posterior  
23  
24 descending artery (p=0.013) (Table 2). In addition, RD tended to have higher  
25  
26 proportion in third and fourth grade of Gensini score (Figure 1).  
27  
28  
29  
30  
31  
32

33 Univariate linear regression analysis showed that right dominance, age, gender,  
34  
35 diabetes and heart rate were associated with increasing Gensini score (Table 3). After  
36  
37 adjusted for age, gender, diabetes and heart rate, right dominance ( $\beta$  6.699, 95%  
38  
39 confidence interval [CI] 1.193-12.205, p=0.017) was positively associated with  
40  
41 Gensini score of patients (Table 4). Final multiple linear regression model also  
42  
43 showed a positive correlation between right dominance and Gensini score.  
44  
45  
46  
47  
48  
49

#### 50 **Discussion**

51  
52 According to the blood supply of the posterior interventricular septum using CAG or  
53  
54 computed tomography coronary angiography, coronary circulation is categorised as  
55  
56  
57  
58  
59  
60



1  
2  
3 right dominance, left dominance, and co-dominance<sup>4</sup>. Previous studies have showed  
4 that coronary artery dominance was closely related to cardiovascular outcomes<sup>4</sup>. A  
5  
6 study of 1131 patient showed that LD was associated with an increased risk of 30-day  
7  
8 mortality and early reinfarction after ST-elevated myocardial infarction<sup>24</sup>. Goldberg et  
9  
10 al. demonstrated that LD was a risk factor for increased long-term mortality in  
11  
12 patients with acute coronary syndrome<sup>7</sup>. However, little is known about the role of  
13  
14 right dominance in the CAD. In this study, we found that patient with right dominance  
15  
16 was associated with the severity of CAD. The results indicated that RD was more  
17  
18 prone to have serious CAD stenosis and may serve as a marker of CAD severity.  
19  
20  
21  
22  
23  
24  
25  
26  
27

28 In the general population, RD anatomy has a prevalence of approximately 70%<sup>10</sup>.  
29  
30 Besides, LD and RD have a reported prevalence of approximately 5-12% and 82-89%  
31  
32 respectively, whereas CD is found in 3-7% of individuals based on hospital  
33  
34 population<sup>5-7, 25, 26</sup>. The proportion of RD, LD and CD in our study was 90.6%, 6.7%  
35  
36 and 2.7% respectively. The phenomenon reminds us that RD group may had higher  
37  
38 percentage in hospital population than general population.  
39  
40  
41  
42  
43  
44

45 Gensini score is a quick and easy way to quantify the severity of CAD in the clinical  
46  
47 work. Therefore, we used this scoring system to further investigate the association  
48  
49 between coronary dominance and CAD. In our study, the total Gensini score of RD  
50  
51 patient was obviously higher than patient with Left-CD. After multiple lineal  
52  
53 regression, RD showed a positive correlation with Gensini score. A previous study  
54  
55  
56  
57  
58  
59  
60

1  
2  
3  
4 with a large population found that RD patient had a higher prevalence of triple vessel  
5  
6 disease than patient with LD<sup>26</sup>. The result indicated that patient with RD tended to  
7  
8 have more serious coronary stenosis. At present, the mechanism between right  
9  
10 dominance and severity of CAD was still not known. Therefore, further researches are  
11  
12 needed to detect the underlying mechanism for developing more severe lesions in the  
13  
14 right dominance.  
15  
16

17  
18  
19 Some potential limitations in this study should be noted. First, our finding was based  
20  
21 on a Northern Chinese population. Therefore, the results should not be extended to all  
22  
23 ethnic groups. Second, our data was obtained from hospital database, so the outcomes  
24  
25 of patients were unavailable. Finally, the study population was relatively small, which  
26  
27 led to a smaller group of individuals with left dominance and co-dominance.  
28  
29  
30

### 31 32 33 **Conclusion**

34  
35  
36 The present study reported that RD patient had a significantly higher proportion of  
37  
38 serious coronary stenosis than patient with LD and CD. Right coronary dominance  
39  
40 was associated with the severity of CAD. A prospective, multi-centre cohort study  
41  
42 may further validate our findings.  
43  
44  
45  
46  
47  
48  
49  
50  
51  
52  
53  
54  
55  
56  
57  
58  
59  
60

### **Acknowledgements**

We thank Qiaolong Hu, Jinni Li, Jian Kang, Chuance Yang, Li Bai, Yufeng Wang, and Wan Gao from Xi'an Jiaotong University School of Medicine for contributing to the data collection. We also acknowledge the support from the patients who participated in our research.

### **Contributors**

All authors contributed to the study design, writing and review of the report. B.Y., J.Y., Q.M. and L.Y. collected the data. B.Z and Y.F did the primary data analysis and J.Y., B.Y. and X.M participated in further data analysis. X.M. handled supervision in our study. All authors approved the final version of the report.

### **Funding**

This research was supported by National Natural Science Foundation of China (Grant number: No. 81471374) and the Clinical Research Award of the First Affiliated Hospital of Xi'an Jiaotong University, China (Grant number: No. XJTU1AF-CRF-2016-005).

### **Competing Interests**

None declared.

### **Data sharing statement**

No additional data are available.

## References

1. Ross R. The pathogenesis of atherosclerosis: a perspective for the 1990s. *Nature*. 1993;362(6423):801-9.
2. Drozda J, Jr., Messer JV, Spertus J, et al. ACCF/AHA/AMA-PCPI 2011 performance measures for adults with coronary artery disease and hypertension: a report of the American College of Cardiology Foundation/American Heart Association Task Force on Performance Measures and the American Medical Association-Physician Consortium for Performance Improvement. *Circulation*. 2011;124(2):248-70.
3. Sinning C, Lillpopp L, Appelbaum S, et al. Angiographic score assessment improves cardiovascular risk prediction: the clinical value of SYNTAX and Gensini application. *Clin Res Cardiol*. 2013;102(7):495-503.
4. Veltman CE, de Graaf FR, Schuijf JD, et al. Prognostic value of coronary vessel dominance in relation to significant coronary artery disease determined with non-invasive computed tomography coronary angiography. *Eur Heart J*. 2012;33(11):1367-77.
5. Kuno T, Numasawa Y, Miyata H, et al. Impact of coronary dominance on in-hospital outcomes after percutaneous coronary intervention in patients with acute coronary syndrome. *PLoS One*. 2013;8(8):e72672.
6. Parikh NI, Honeycutt EF, Roe MT, et al. Left and codominant coronary artery circulations are associated with higher in-hospital mortality among patients undergoing percutaneous coronary intervention for acute coronary syndromes: report From the National Cardiovascular Database Cath Percutaneous Coronary Intervention (CathPCI) Registry. *Circ Cardiovasc Qual Outcomes*. 2012;5(6):775-82.
7. Goldberg A, Southern DA, Galbraith PD, et al. Coronary dominance and prognosis of patients with acute coronary syndrome. *Am Heart J*. 2007;154(6):1116-22.
8. Altin C, Kanyilmaz S, Koc S, et al. Coronary anatomy, anatomic variations and anomalies: a retrospective coronary angiography study. *Singapore Med J*. 2015;56(6):339-45.
9. Abuchaim DC, Tanamati C, Jatene MB, et al. Coronary dominance patterns in hypoplastic left heart syndrome. *Rev Bras Cir Cardiovasc*. 2011;26(4):604-8.
10. Pelter MM, Al-Zaiti SS, Carey MG. Coronary artery dominance. *Am J Crit Care*. 2011;20(5):401-2.
11. Abu-Assi E, Castineira-Busto M, Gonzalez-Salvado V, et al. Coronary Artery Dominance and Long-term Prognosis in Patients With ST-segment Elevation Myocardial Infarction Treated With Primary Angioplasty. *Rev Esp Cardiol (Engl Ed)*. 2016;69(1):19-27.
12. Waziri H, Jorgensen E, Kelbaek H, et al. Acute myocardial infarction and lesion location in the left circumflex artery: importance of coronary artery dominance. *EuroIntervention*. 2015;11(5).
13. Veltman CE, van der Hoeven BL, Hoogslag GE, et al. Influence of coronary vessel dominance on short- and long-term outcome in patients after ST-segment elevation myocardial infarction. *Eur Heart J*. 2015;36(17):1023-30.
14. Omerbasic E, Hasanovic A, Omerbasic A, et al. Prognostic value of anatomical dominance of coronary circulation in patients with surgical myocardial revascularization. *Med Arch*. 2015;69(1):6-9.
15. Lam MK, Tandjung K, Sen H, et al. Coronary artery dominance and the risk of adverse clinical events following percutaneous coronary intervention: insights from the prospective, randomised TWENTE trial. *EuroIntervention*. 2015;11(2):180-7.

16. Mancia G, Fagard R, Narkiewicz K, et al. 2013 ESH/ESC Guidelines for the management of arterial hypertension: the Task Force for the management of arterial hypertension of the European Society of Hypertension (ESH) and of the European Society of Cardiology (ESC). *J Hypertens*. 2013;31(7):1281-357.
17. Vijan S. Type 2 diabetes. *Ann Intern Med*. 2010;152(5):ITC31-15; quiz ITC316.
18. Hou X, Qiu J, Chen P, et al. Cigarette Smoking Is Associated with a Lower Prevalence of Newly Diagnosed Diabetes Screened by OGTT than Non-Smoking in Chinese Men with Normal Weight. *PLoS One*. 2016;11(3):e0149234.
19. Levine GN, Bates ER, Blankenship JC, et al. 2011 ACCF/AHA/SCAI Guideline for Percutaneous Coronary Intervention: a report of the American College of Cardiology Foundation/American Heart Association Task Force on Practice Guidelines and the Society for Cardiovascular Angiography and Interventions. *Circulation*. 2011;124(23):e574-651.
20. Wang GN, Sun K, Hu DL, et al. Serum cystatin C levels are associated with coronary artery disease and its severity. *Clin Biochem*. 2014;47(16-17):176-81.
21. Yongsakulchai P, Settasatian C, Settasatian N, et al. Association of combined genetic variations in PPARgamma, PGC-1alpha, and LXRAalpha with coronary artery disease and severity in Thai population. *Atherosclerosis*. 2016;248:140-8.
22. Liu H, Guan S, Fang W, et al. Associations between pentraxin 3 and severity of coronary artery disease. *BMJ Open*. 2015;5(4):e007123.
23. Ndrepepa G, Tada T, Fusaro M, et al. Association of coronary atherosclerotic burden with clinical presentation and prognosis in patients with stable and unstable coronary artery disease. *Clin Res Cardiol*. 2012;101(12):1003-11.
24. Stribling WK, Kontos MC, Abbate A, et al. Clinical outcomes in patients with acute left circumflex/obtuse marginal occlusion presenting with myocardial infarction. *J Interv Cardiol*. 2011;24(1):27-33.
25. Eren S, Bayram E, Fil F, et al. An investigation of the association between coronary artery dominance and coronary artery variations with coronary arterial disease by multidetector computed tomographic coronary angiography. *J Comput Assist Tomogr*. 2008;32(6):929-33.
26. Vasheghani-Farahani A, Kassaian SE, Yaminisharif A, et al. The association between coronary arterial dominance and extent of coronary artery disease in angiography and paraclinical studies. *Clin Anat*. 2008;21(6):519-23.

## Figure Legends

**Figure 1** Distribution of RD and Left-CD group in different grade of Gensini score.

For peer review only

Table 1 Baseline characteristics of patients

| <b>Clinical variables</b>            | Total<br>(n=1654) | First<br>(n=347) | Second<br>(n=329) | Third<br>(n=486) | Fourth<br>(n=492) |
|--------------------------------------|-------------------|------------------|-------------------|------------------|-------------------|
| Age (years)                          | 59.4±10.4         | 58.5±9.9         | 59.1±10.6         | 59.3±10.6        | 60.2±10.4         |
| Gender, n (%)                        |                   |                  |                   |                  |                   |
| Male                                 | 1235 (74.7)       | 225 (64.8)       | 239 (72.6)        | 368 (75.7)       | 403 (81.9)        |
| Female                               | 419 (25.3)        | 122 (35.2)       | 90 (27.4)         | 118 (24.3)       | 89 (18.1)         |
|                                      |                   | 135.8±19.        |                   |                  |                   |
| Baseline SBP (mmHg)                  | 134.6±21.0        | 9                | 135.8±20.4        | 134.4±20.6       | 133.1±22.6        |
| Baseline DBP (mmHg)                  | 78.3±12.3         | 79.1±12.9        | 78.5±12.0         | 77.7±11.3        | 78.3±12.8         |
| Heart rate (bpm)                     | 75.5±13.2         | 74.3±12.1        | 75.3±14.0         | 75.4±12.6        | 76.6±14.1         |
| CAD risk factors, n (%)              |                   |                  |                   |                  |                   |
| Diabetes Mellitus                    | 321 (19.4)        | 33 (9.5)         | 65 (19.8)         | 102 (21.0)       | 121 (24.6)        |
| Hypertension                         | 870 (52.6)        | 174 (50.1)       | 175 (53.2)        | 263 (54.1)       | 258 (52.4)        |
| Current smoking                      | 841 (50.8)        | 156 (45.0)       | 170 (51.7)        | 262 (53.9)       | 253 (51.4)        |
| Hyperlipidemia                       | 182 (11.0)        | 42 (12.1)        | 37 (11.2)         | 51 (10.5)        | 52 (10.6)         |
| Dignosis, n (%)                      |                   |                  |                   |                  |                   |
| AMI                                  | 730 (44.1)        | 44 (12.7)        | 97 (29.5)         | 251 (51.6)       | 338 (68.7)        |
| Unstable angina                      | 311 (18.8)        | 67 (19.3)        | 83 (25.2)         | 81 (16.7)        | 80 (16.3)         |
| CAD on CAG, n (%)                    |                   |                  |                   |                  |                   |
| One vessel disease ( $\geq$<br>50%)  | 465 (28.1)        | 239 (68.9)       | 124 (37.7)        | 76 (15.6)        | 26 (5.3)          |
| Multivessel disease<br>( $\geq$ 50%) | 1189 (71.9)       | 108 (31.1)       | 205 (62.3)        | 410 (84.4)       | 466 (94.7)        |
| History, n (%)                       |                   |                  |                   |                  |                   |
| Prior MI                             | 134 (8.1)         | 9 (2.6)          | 16 (4.9)          | 49 (10.1)        | 60 (12.2)         |
| Family history of<br>CAD             | 475 (28.7)        | 107 (30.8)       | 98 (29.8)         | 126 (25.9)       | 144 (29.3)        |
| Coronary dominance, n<br>(%)         |                   |                  |                   |                  |                   |

|        |             |            |            |            |            |
|--------|-------------|------------|------------|------------|------------|
| Right- | 1500 (90.6) | 304 (87.6) | 297 (90.3) | 445 (91.5) | 454 (92.3) |
| Left-  | 110 (6.7)   | 30 (8.7)   | 22 (6.7)   | 30 (6.2)   | 28 (5.7)   |
| Co-    | 44 (2.7)    | 13 (3.7)   | 10 (3.0)   | 11 (2.3)   | 10 (2.0)   |

Four groups were based on Gensini score: first grade (0-12.5), second grade (13-24.5), third grade (25-52.5) and fourth grade ( $\geq 53$ ). Results are presented as mean  $\pm$  standard deviation or n (%). AMI, acute myocardial infarction; CAD, coronary artery disease; CAG, coronary artery angiography; DBP, diastolic blood pressure; MI, myocardial infarction; SBP, systolic blood pressure.

For peer review only



Table 2 Gensini score and coronary dominance

|                             | RD (n=1500) | Left+CD (n=154) | P      |
|-----------------------------|-------------|-----------------|--------|
| Age (years)                 | 59.4±10.4   | 59.2±9.5        | 0.769  |
| Gender, n (%)               |             |                 | 0.242  |
| Male                        | 1114 (74.3) | 121 (78.6)      |        |
| Female                      | 386 (25.7)  | 33 (21.4)       |        |
| Baseline SBP (mmHg)         | 134.8±21.2  | 132.6±19.5      | 0.231  |
| Baseline DBP (mmHg)         | 78.4±12.4   | 78.1±11.0       | 0.819  |
| Heart rate (bpm)            | 75.4±13.1   | 76.5±14.8       | 0.341  |
| CAD risk factors, n (%)     |             |                 |        |
| Diabetes Mellitus           | 295 (19.7)  | 26 (16.9)       | 0.406  |
| Hypertension                | 797 (53.1)  | 73 (47.4)       | 0.175  |
| Current smoking             | 758 (50.5)  | 83 (53.9)       | 0.427  |
| Hyperlipidemia              | 164 (10.9)  | 18 (11.7)       | 0.776  |
| Total Gensini score         | 42.3±33.6   | 36.3±29.8       | 0.033  |
| LM                          | 1.7±7.3     | 1.7±7.7         | 0.935  |
| LAD                         | 21.1±21.1   | 19.7±20.0       | 0.433  |
| RCA                         | 7.8±10.8    | 4.7±8.5         | <0.001 |
| LCX                         | 9.1±14.5    | 8.2±12.4        | 0.424  |
| Diagonal branch             | 1.3±2.7     | 1.1±2.4         | 0.402  |
| Septal branch               | 0.1±0.5     | 0.1±0.8         | 0.491  |
| OM                          | 0.7±2.2     | 0.6±2.0         | 0.848  |
| Posterior descending artery | 0.6±2.1     | 0.2±1.5         | 0.013  |

LAD, left anterior descending branch; LCx, left circumflex branch; LM, left main coronary artery; OM, obtuse marginal branch; RCA, right coronary artery.

Table 3 Univariate linear regression analysis for Gensini score

| Variable              | $\beta$ (95% CI)         | P      |
|-----------------------|--------------------------|--------|
| Right Dominance       | 5.991 (0.474 to 11.508)  | 0.033  |
| Age                   | 0.187 (0.033 to 0.342)   | 0.017  |
| Male                  | 9.811 (6.150 to 13.472)  | <0.001 |
| Smoking               | 1.098 (-2.113 to 4.309)  | 0.503  |
| Hypertension          | 1.033 (-2.182 to 4.247)  | 0.529  |
| Diabetes Mellitus     | 8.408 (4.369 to 12.447)  | <0.001 |
| Hyperlipidemia        | -2.038 (-7.167 to 3.091) | 0.436  |
| Family history of CAD | -0.652 (-4.200 to 2.896) | 0.719  |
| SBP                   | -0.065 (-0.142 to 0.013) | 0.100  |
| DBP                   | -0.008 (-0.141 to 0.125) | 0.911  |
| Heart rate            | 0.148 (0.025 to 0.271)   | 0.018  |

CAD, coronary artery disease; DBP, diastolic blood pressure; SBP, systolic blood pressure.

Table 4 Multivariate linear regression analysis for Gensini score

| Variable   | $\beta$ (95% CI)        | P value |
|------------|-------------------------|---------|
| Unadjusted | 5.991 (0.474 to 11.508) | 0.033   |
| Model 1    | 6.404 (0.945 to 11.862) | 0.022   |
| Model 2    | 6.699 (1.193 to 12.205) | 0.017   |
| Model 3    | 6.829 (1.312 to 12.346) | 0.015   |

Model 1 adjusted age and gender

Model 2 adjusted age and gender, diabetes, heart rate

Model 3 adjusted age and gender, diabetes, heart rate, smoking, hypertension, hyperlipidemia, history of CAD, SBP, DBP



Figure 1 Distribution of RD and Left-CD group in different grade of Gensini score.

67x45mm (300 x 300 DPI)

**STROBE 2007 (v4) Statement—Checklist of items that should be included in reports of *cross-sectional studies***

| Section/Topic                | Item # | Recommendation                                                                                                                                                                       | Reported on page # |
|------------------------------|--------|--------------------------------------------------------------------------------------------------------------------------------------------------------------------------------------|--------------------|
| <b>Title and abstract</b>    | 1      | (a) Indicate the study’s design with a commonly used term in the title or the abstract                                                                                               | 1                  |
|                              |        | (b) Provide in the abstract an informative and balanced summary of what was done and what was found                                                                                  | 2                  |
| <b>Introduction</b>          |        |                                                                                                                                                                                      |                    |
| Background/rationale         | 2      | Explain the scientific background and rationale for the investigation being reported                                                                                                 | 4                  |
| Objectives                   | 3      | State specific objectives, including any prespecified hypotheses                                                                                                                     | 4                  |
| <b>Methods</b>               |        |                                                                                                                                                                                      |                    |
| Study design                 | 4      | Present key elements of study design early in the paper                                                                                                                              | 5                  |
| Setting                      | 5      | Describe the setting, locations, and relevant dates, including periods of recruitment, exposure, follow-up, and data collection                                                      | 5                  |
| Participants                 | 6      | (a) Give the eligibility criteria, and the sources and methods of selection of participants                                                                                          | 5                  |
| Variables                    | 7      | Clearly define all outcomes, exposures, predictors, potential confounders, and effect modifiers. Give diagnostic criteria, if applicable                                             | 5-6                |
| Data sources/<br>measurement | 8*     | For each variable of interest, give sources of data and details of methods of assessment (measurement). Describe comparability of assessment methods if there is more than one group | 5-6                |
| Bias                         | 9      | Describe any efforts to address potential sources of bias                                                                                                                            | 6-7                |
| Study size                   | 10     | Explain how the study size was arrived at                                                                                                                                            | 5                  |
| Quantitative variables       | 11     | Explain how quantitative variables were handled in the analyses. If applicable, describe which groupings were chosen and why                                                         | 6-7                |
| Statistical methods          | 12     | (a) Describe all statistical methods, including those used to control for confounding                                                                                                | 6-7                |
|                              |        | (b) Describe any methods used to examine subgroups and interactions                                                                                                                  | N/A                |
|                              |        | (c) Explain how missing data were addressed                                                                                                                                          | N/A                |
|                              |        | (d) If applicable, describe analytical methods taking account of sampling strategy                                                                                                   | N/A                |
|                              |        | (e) Describe any sensitivity analyses                                                                                                                                                | N/A                |
| <b>Results</b>               |        |                                                                                                                                                                                      |                    |

|                          |     |                                                                                                                                                                                                              |     |
|--------------------------|-----|--------------------------------------------------------------------------------------------------------------------------------------------------------------------------------------------------------------|-----|
| Participants             | 13* | (a) Report numbers of individuals at each stage of study—eg numbers potentially eligible, examined for eligibility, confirmed eligible, included in the study, completing follow-up, and analysed            | 7   |
|                          |     | (b) Give reasons for non-participation at each stage                                                                                                                                                         | N/A |
|                          |     | (c) Consider use of a flow diagram                                                                                                                                                                           | N/A |
| Descriptive data         | 14* | (a) Give characteristics of study participants (eg demographic, clinical, social) and information on exposures and potential confounders                                                                     | 7   |
|                          |     | (b) Indicate number of participants with missing data for each variable of interest                                                                                                                          | N/A |
| Outcome data             | 15* | Report numbers of outcome events or summary measures                                                                                                                                                         | 7   |
| Main results             | 16  | (a) Give unadjusted estimates and, if applicable, confounder-adjusted estimates and their precision (eg, 95% confidence interval). Make clear which confounders were adjusted for and why they were included | 7-8 |
|                          |     | (b) Report category boundaries when continuous variables were categorized                                                                                                                                    | 7-8 |
|                          |     | (c) If relevant, consider translating estimates of relative risk into absolute risk for a meaningful time period                                                                                             | N/A |
| Other analyses           | 17  | Report other analyses done—eg analyses of subgroups and interactions, and sensitivity analyses                                                                                                               | N/A |
| <b>Discussion</b>        |     |                                                                                                                                                                                                              |     |
| Key results              | 18  | Summarise key results with reference to study objectives                                                                                                                                                     | 8   |
| Limitations              | 19  | Discuss limitations of the study, taking into account sources of potential bias or imprecision. Discuss both direction and magnitude of any potential bias                                                   | 9   |
| Interpretation           | 20  | Give a cautious overall interpretation of results considering objectives, limitations, multiplicity of analyses, results from similar studies, and other relevant evidence                                   | 8-9 |
| Generalisability         | 21  | Discuss the generalisability (external validity) of the study results                                                                                                                                        | 10  |
| <b>Other information</b> |     |                                                                                                                                                                                                              |     |
| Funding                  | 22  | Give the source of funding and the role of the funders for the present study and, if applicable, for the original study on which the present article is based                                                | 11  |

\*Give information separately for cases and controls in case-control studies and, if applicable, for exposed and unexposed groups in cohort and cross-sectional studies.

**Note:** An Explanation and Elaboration article discusses each checklist item and gives methodological background and published examples of transparent reporting. The STROBE checklist is best used in conjunction with this article (freely available on the Web sites of PLoS Medicine at <http://www.plosmedicine.org/>, Annals of Internal Medicine at <http://www.annals.org/>, and Epidemiology at <http://www.epidem.com/>). Information on the STROBE Initiative is available at [www.strobe-statement.org](http://www.strobe-statement.org).
